1 Palmitoylation targets the Calcineurin phosphatase to the  
2 Phosphatidylinositol 4-kinase complex at the plasma membrane

3  
4  
5  
6  
7 Idil Ulengin-Talkish<sup>1</sup>, Matthew AH Parson<sup>2</sup>, Meredith L Jenkins<sup>2</sup> Jagoree Roy<sup>1</sup>, Alexis ZL  
8 Shih<sup>3\*</sup>, Nicole St-Denis<sup>4^</sup>, Gergo Gulyas<sup>5</sup>, Tamas Balla<sup>5</sup>, Anne-Claude Gingras<sup>4,6</sup>, Péter  
9 Várnai<sup>7</sup>, Elizabeth Conibear<sup>3</sup>, John E Burke<sup>2,8</sup>, Martha S. Cyert<sup>1, #</sup>

10  
11  
12 1. Department of Biology, Stanford University, Stanford CA

13 2. Department of Biochemistry and Microbiology, University of Victoria BC, Canada

14 3. Department of Medical Genetics, University of British Columbia, Vancouver, Canada

15 4. Lunenfeld-Tanenbaum Research Institute at Mount Sinai Hospital, University of  
16 Toronto, Toronto, Canada

17 5. Section on Molecular Signal Transduction, National Institute of Child Health and Human  
18 Development, National Institutes of Health, Bethesda, MD

19 6. Department of Molecular Genetics, University of Toronto, Toronto, ON, Canada

20 7. Department of Physiology, Faculty of Medicine, Semmelweis University, Budapest,  
21 Hungary

22 8. Department of Biochemistry, The University of British Columbia, Vancouver BC,  
23 Canada

24  
25 \* Present address: Max-Delbrueck Center for Molecular Medicine, Berlin, Germany

26 ^ Present address: High-Fidelity Science Communications, Summerside, PE, Canada

27 # Corresponding author

28 *Lead contact E-mail address:* mcyert@stanford.edu

29 **Abstract:**

30 Calcineurin, the conserved protein phosphatase and target of immunosuppressants, is a  
31 critical mediator of  $\text{Ca}^{2+}$  signaling. To discover novel calcineurin-regulated processes we  
32 examined an understudied isoform, CNA $\beta$ 1. We show that unlike canonical cytosolic  
33 calcineurin, CNA $\beta$ 1 localizes to the plasma membrane and Golgi due to palmitoylation of its  
34 divergent C-terminal tail, which is reversed by the ABHD17A depalmitoylase. Palmitoylation  
35 targets CNA $\beta$ 1 to a distinct set of membrane-associated interactors including the  
36 phosphatidylinositol 4-kinase (PI4KA) complex containing EFR3B, PI4KA, TTC7B and  
37 FAM126A. Hydrogen-deuterium exchange reveals multiple calcineurin-PI4KA complex  
38 contacts, including a calcineurin-binding peptide motif in the disordered tail of FAM126A,  
39 which we establish as a calcineurin substrate. Calcineurin inhibitors decrease PI4P  
40 production during Gq-coupled GPCR signaling, suggesting that calcineurin  
41 dephosphorylates and promotes PI4KA complex activity. In sum, this work discovers a new  
42 calcineurin-regulated signaling pathway highlighting the PI4KA complex as a regulatory  
43 target and revealing that dynamic palmitoylation confers unique localization, substrate  
44 specificity and regulation to CNA $\beta$ 1.

45

46 **Introduction**

47 Cells respond to changes in their environment via signaling pathways, including  
48 those regulated by calcium ions ( $\text{Ca}^{2+}$ ). The amplitude and duration of dynamic changes in  
49 the intracellular  $\text{Ca}^{2+}$  concentration provide specific temporal and spatial cues that direct a  
50 myriad of physiological responses. Hence, elucidating mechanisms that initiate  $\text{Ca}^{2+}$   
51 signaling and identifying downstream  $\text{Ca}^{2+}$  sensing-effectors are critical for understanding  
52 cellular regulation in both healthy and diseased cells.

53 Calcineurin (CN/PP2B/PPP3), the conserved  $\text{Ca}^{2+}$ /calmodulin (CaM)-activated  
54 serine/threonine protein phosphatase, transduces  $\text{Ca}^{2+}$  signals to regulate a wide-array of  
55 physiological processes. In humans, CN is ubiquitously expressed and has well-established

56 roles in the cardiovascular, nervous, and immune systems<sup>1-3</sup>. Because CN  
57 dephosphorylates NFAT (Nuclear Factor of Activated T-cells) transcription factors to activate  
58 the adaptive immune response<sup>4</sup>, CN inhibitors FK506 (Tacrolimus) and cyclosporin A (CsA)  
59 are in wide clinical use as immunosuppressants<sup>5</sup>. However, by inhibiting CN in non-immune  
60 tissues, these drugs also provoke a variety of unwanted effects which underscores the need  
61 to comprehensively map CN signaling throughout the body. Recently, systematic discovery  
62 of CN targets revealed that many CN-regulated pathways are yet to be elucidated<sup>6,7</sup>. Here,  
63 we uncover novel aspects of CN signaling by focusing on an understudied isoform, CNA $\beta$ 1.

64 Calcineurin is an obligate heterodimer of catalytic (CNA) and regulatory (CNB)  
65 subunits. In mammals, three isoforms of CNA ( $\alpha$ ,  $\beta$  and  $\gamma$ ) are encoded by separate genes  
66 with tissue specific expression. These isoforms display a similar domain architecture  
67 consisting of a catalytic domain, binding sites for CNB and CaM, and a C-terminal  
68 autoinhibitory domain (AID) which blocks phosphatase activity under basal conditions. Under  
69 signaling conditions that give rise to cytosolic Ca<sup>2+</sup> levels, binding of both Ca<sup>2+</sup> and  
70 Ca<sup>2+</sup>/CaM to CNB and CNA, respectively, disrupts inhibition of the catalytic site by the AID<sup>8-</sup>  
71 <sup>12</sup>. This activation mechanism is conserved across all CN isoforms in animals and fungi, with  
72 the only known exception being a transcript variant of the CNA $\beta$  gene, termed CNA $\beta$ 1<sup>13-15</sup>.

73 Alternative 3' end processing of the *PPP3CB* mRNA gives rise to two CNA $\beta$  isoforms,  
74 CNA $\beta$ 2 with canonical architecture, and the non-canonical CNA $\beta$ 1<sup>13,14</sup>. CNA $\beta$ 1 and CNA $\beta$ 2  
75 share N-terminal sequence identity through the CaM-binding domain, but exclusion of two  
76 terminal exons and subsequent translation of intronic sequences results in a divergent C-  
77 terminus for CNA $\beta$ 1 that is hydrophobic and lacks the AID (Fig. 1a). This alternative C-  
78 terminal tail is conserved in vertebrates (Fig. 1b) and CNA $\beta$ 1 is broadly expressed in human  
79 tissues at a low level, alongside the canonical CN isoforms<sup>14,15</sup>. *In vitro* biochemical  
80 characterization of CNA $\beta$ 1 identified an autoinhibitory sequence, <sup>462</sup>LAVP<sup>465</sup>, in its C-terminal  
81 tail, which impedes substrate binding<sup>15</sup>. CN recognizes substrates by binding two short,  
82 degenerate peptide motifs, "PxIxIT" and "LxVP", found primarily in the disordered regions of

83 its substrates<sup>16</sup>. LxVP motifs bind to a region at the CNA/CNB interface that is accessible  
84 only after Ca<sup>2+</sup>/CaM binding<sup>16-21</sup>. FK506 and CsA inhibit CN by blocking this LxVP binding  
85 pocket, showing that this interaction is essential for dephosphorylation<sup>21</sup>. Notably, the  
86 maximal activity of CNAβ1 is limited compared to CNAβ2 due to this LxVP-mediated  
87 autoinhibition which is only partially relieved by Ca<sup>2+</sup>/CaM *in vitro*<sup>15</sup>. However, mechanisms  
88 that govern the activity of this isozyme *in vivo* remain to be investigated.

89 To date, efforts to discover CN-regulated processes have focused on canonical CN  
90 isoforms, leaving CNAβ1 significantly understudied. Interestingly, the few published studies  
91 about this isoform demonstrate that it has unique physiological roles. For example, CNAβ1  
92 overexpression in mouse cardiomyocytes is cardio-protective following myocardial infarction,  
93 rather than pro-hypertrophic, as observed for canonical CNAβ2<sup>22-24</sup>. Furthermore, mice  
94 specifically lacking CNAβ1 are viable, but develop cardiac hypertrophy and exhibit metabolic  
95 alterations<sup>24</sup>. CNAβ1 also regulates the differentiation of mouse embryonic stem cells and  
96 activates mTORC2/AKT signaling through an undetermined mechanism that may be  
97 independent of its catalytic activity<sup>14,22,25</sup>. Additionally, unlike CNAβ2, CNAβ1 does not  
98 dephosphorylate NFAT<sup>22</sup>, and its direct substrates are yet to be identified. Thus, elucidation  
99 of these targets promises to reveal novel aspects of Ca<sup>2+</sup> and CN signaling.

100 Some of the best-characterized pathways that generate intracellular Ca<sup>2+</sup> signals are  
101 initiated by ligand binding to Gq-protein coupled receptors (GPCR), causing phospholipase  
102 C (PLC) to hydrolyze phosphatidylinositol 4,5-bisphosphate [PI(4,5)P<sub>2</sub> or PIP<sub>2</sub>] into  
103 diacylglycerol (DAG) and inositol triphosphate (IP<sub>3</sub>). These products activate protein kinase  
104 C (PKC) and intracellular Ca<sup>2+</sup> release, respectively<sup>26</sup>. Therefore, sustained Ca<sup>2+</sup> signaling  
105 through GPCRs requires continued phosphorylation of plasma membrane (PM)  
106 phosphatidylinositol (PI) to generate phosphatidylinositol 4-phosphate (PI4P), the precursor  
107 of PI(4,5)P<sub>2</sub>. Indeed, studies monitoring the PM phospholipid levels in real-time reveal that  
108 during GPCR signaling, concomitant with PIP<sub>2</sub> depletion, PI4P synthesis increases through  
109 the activity of phosphatidylinositol 4-kinase IIIα (PI4KA)<sup>27,28</sup>.



110 PI4KA is recruited to the PM by associating with at least two accessory proteins,  
111 EFR3A/B and TTC7A/B, a mechanism that is conserved from yeast to mammals<sup>29-32</sup>. EFR3,  
112 which is stably associated with the PM due to its palmitoylation, serves as the membrane  
113 anchor for this complex<sup>33</sup>. TTC7 (Ypp1 in yeast) binds to both EFR3 and PI4KA (Stt4 in  
114 yeast) and acts as the shuttle. A third protein, either FAM126A (Hyccin) or FAM126B,  
115 present only in higher eukaryotes, is an essential, regulatory component that stabilizes the  
116 TTC7-PI4KA interaction in the cytosol, and enhances recruitment of PI4KA to the PM<sup>30</sup>.  
117 Recent structural studies show that PI4KA/TTC7/FAM126A heterotrimers form a dimer, and  
118 this super-assembly likely stabilizes and orients the PI4KA active site toward the membrane  
119 to promote its activity<sup>34</sup>. Furthermore, a recent biochemical study reveals that the disordered  
120 C-terminus of FAM126A, which is not present in existing structural data, modulates the  
121 PI4KA catalytic activity *in vitro* through an unknown mechanism<sup>35</sup>. This intricate structure  
122 suggests that both the assembly and activity of the PI4KA complex are tightly regulated. In  
123 yeast, PI4KA recruitment to the PM is regulated by phosphorylation<sup>32</sup>. However, in  
124 mammals, how the assembly and/or activity of the PI4KA complex is regulated remains to  
125 be elucidated.

126 In this work, we discover novel functions for CN by focusing on the CNA $\beta$ 1/CNB  
127 isozyme. We demonstrate that unlike the cytosolic canonical CNA $\beta$ 2, CNA $\beta$ 1 localizes to  
128 cellular membranes, primarily to the PM and Golgi apparatus, via palmitoylation of two  
129 conserved cysteines within its unique C-terminus. Palmitoylation of CNA $\beta$ 1 is dynamic and is  
130 reversed by the ABHD17A thioesterase leading to its redistribution and suggesting that  
131 dynamic palmitoylation regulates CNA $\beta$ 1 signaling *in vivo*. To identify potential CNA $\beta$ 1  
132 substrates we carried out affinity purification coupled to mass spectrometry (AP-MS) which  
133 revealed CNA $\beta$ 1-specific interactors to be largely membrane-associated, and unexpectedly  
134 identified all four members of the PI4KA complex. Using *in vivo* and *in vitro* analyses,  
135 including hydrogen deuterium exchange mass spectrometry (HDX-MS), we identified  
136 multiple sites of CN-PI4KA complex association, including a direct interaction with a short

137 linear motif, PSISIT, within the unstructured C-terminal tail of FAM126A. Our studies  
138 establish FAM126A as a CN substrate that preferentially interacts with CNA $\beta$ 1 at the PM.  
139 Finally, we uncover a role for CN in the production of PI4P at the PM by PI4KA in response  
140 to ligand induced signaling from the type-3 muscarinic receptor. In total, this work discovers  
141 a new CN-regulated signaling pathway that highlights the PI4KA complex as a regulatory  
142 target and demonstrates that palmitoylation dictates substrate specificity of the non-  
143 canonical CNA $\beta$ 1 isoform.

## 144 **Results**

### 145 **CNA $\beta$ 1 localizes to the plasma membrane, Golgi apparatus and intracellular vesicles**

146 We sought to investigate the unique functions of CNA $\beta$ 1 by characterizing its *in vivo*  
147 properties. First, we analyzed the intracellular distribution of CNA $\beta$ 1, which was previously  
148 found to be Golgi-associated in mouse embryonic stem cells<sup>25</sup>. Using subcellular  
149 fractionation of COS-7 cells expressing FLAG-tagged CNA $\beta$ 1 or CNA $\beta$ 2, we confirmed that  
150 CNA $\beta$ 1 was highly enriched in the membrane fraction while CNA $\beta$ 2 was primarily found in  
151 the cytosol fraction (Fig. 1 c-d). Furthermore, indirect immunofluorescence of these cells  
152 revealed that CNA $\beta$ 1 localized to the PM, where it overlapped significantly with a co-  
153 expressed PM marker (Venus-RIT)<sup>36</sup>, the Golgi apparatus, where it co-localized with the  
154 Golgi protein GM130, and to intracellular vesicles. By contrast, CNA $\beta$ 2 was predominantly  
155 present in the cytoplasm with minimal co-localization with either membrane marker (Fig. 1 e-  
156 f). Similar observations were also made in HeLa cells (Supplementary Fig.1a).

157

### 158 **CNA $\beta$ 1 is palmitoylated at two conserved cysteines unique to its C-terminal tail**

159 S-Palmitoylation, the reversible addition of a 16-carbon fatty acid chain to cysteine residues  
160 via a thioester linkage, allows proteins lacking a transmembrane domain to associate with  
161 cellular membranes. The alternative C-terminus of CNA $\beta$ 1 contains two highly conserved  
162 cysteines, C483 and C493 (Fig. 1a and b), one of which (C493) is predicted as a high-  
163 confidence S-palmitoylation site<sup>37</sup>. We reasoned that this modification might mediate

164 CNA $\beta$ 1 membrane association, particularly as C483 is contained within a previously defined  
165 "Golgi localization domain" <sup>25,38</sup>. First, we investigated this possibility using acyl resin-  
166 assisted capture (Acyl-RAC), during which the thioester linkage in palmitoylated cysteines is  
167 cleaved with hydroxylamine (NH<sub>2</sub>OH) to allow protein binding to thiopropyl-sepharose beads  
168 <sup>39</sup>. Supporting our hypothesis, Acyl-RAC analysis of FLAG-CNA $\beta$ 2, FLAG-CNA $\beta$ 1 or EFR3B-  
169 FLAG expressed in COS-7 cells revealed the presence of S-palmitoylated cysteines in  
170 EFR3B and CNA $\beta$ 1, but not CNA $\beta$ 2 (Supplementary Fig. 1b). CNA $\beta$ 1 mutants containing  
171 either single or double serine substitutions at C483 and/or C493, from here on referred to as  
172 CNA $\beta$ 1<sup>C483S</sup>, CNA $\beta$ 1<sup>C493S</sup> and CNA $\beta$ 1<sup>C2S</sup> respectively, were not captured by Acyl-RAC  
173 suggesting that at least one of these residues is palmitoylated (Supplementary Fig. 1b). To  
174 further determine the stoichiometry of CNA $\beta$ 1 palmitoylation, we used acyl-PEG exchange  
175 (APE) in which the palmitate groups on modified cysteines are removed by hydroxylamine  
176 and replaced with a mass-tag (mPEG) that causes a 5 kDa mass-shift for each acylated  
177 cysteine <sup>40</sup>. For these experiments we used two controls: EFR3B which contains three  
178 palmitoylated cysteine residues and the ER chaperone calnexin with two sites of  
179 palmitoylation <sup>33,41</sup>. As expected, EFR3B-FLAG showed three distinct bands corresponding  
180 to mass-shifts and the endogenous calnexin showed two mass-shifts in all samples (Fig.  
181 1g). As expected, the cytosolic FLAG-CNA $\beta$ 2 showed no shifts. FLAG-CNA $\beta$ 1, however,  
182 displayed two distinct mass-shifted forms indicating two sites of palmitoylation. Interestingly,  
183 no changes in electrophoretic mobility were observed for CNA $\beta$ 1<sup>C483S</sup>, CNA $\beta$ 1<sup>C493S</sup> or  
184 CNA $\beta$ 1<sup>C2S</sup>, indicating that both cysteines are required for stable palmitoylation. Thus, we  
185 infer that CNA $\beta$ 1 palmitoylation on both sites is a cooperative process, similar to that  
186 described for calnexin <sup>42</sup>.

187

### 188 **Palmitoylation is required for CNA $\beta$ 1 membrane association**

189 To further investigate a role for palmitoylation in the membrane association of CNA $\beta$ 1, we  
190 first metabolically labelled COS-7 cells with the palmitate analog, 17-octadecynoic acid (17-

191 ODYA) and showed that upon subcellular fractionation, the majority of the 17-ODYA-labelled  
192 CNA $\beta$ 1 was in the membrane fraction (Supplementary Fig. 1c). Next, we analyzed the  
193 fractionation of palmitoylation-defective mutants CNA $\beta$ 1<sup>C483S</sup>, CNA $\beta$ 1<sup>C493S</sup> and CNA $\beta$ 1<sup>C2S</sup>  
194 which, in contrast to wildtype CNA $\beta$ 1, were predominantly enriched in the cytosolic fraction  
195 (Fig. 1c, d). Finally, we examined the localization of each mutant using indirect  
196 immunofluorescence. As expected, FLAG-CNA $\beta$ 1<sup>C493S</sup> and FLAG-CNA $\beta$ 1<sup>C2S</sup> mutants were  
197 cytosolic and did not co-localize with either PM or Golgi membrane markers (Venus RIT and  
198 GM130, respectively) (Fig. 1e, f and Supplementary Fig. 1e, f). Interestingly, although FLAG-  
199 CNA $\beta$ 1<sup>C483S</sup> was predominantly cytosolic, a minority of cells exhibited weak Golgi and PM  
200 localization (Supplementary Fig. 1e (top panel, red and green boxes), f), suggesting that this  
201 mutant might be palmitoylated at low levels that is insufficient for stable membrane  
202 association. Thus, we speculate that Cys493 may be the priming palmitoylation site that  
203 promotes efficient palmitoylation of Cys483. In sum, these analyses show that both Cys483  
204 and Cys493 are palmitoylated and that dual palmitoylation is required for the stable  
205 association of CNA $\beta$ 1 with membranes, particularly with the PM. Therefore, the unique  
206 lipidated C-terminal tail of CNA $\beta$ 1 confers distinct localization to this isoform.

207

### 208 **CNA $\beta$ 1 palmitoylation is dynamically regulated**

209 Protein palmitoylation is reversed by acyl protein thioesterases (depalmitoylases) and  
210 dynamic palmitoylation regulates the localization and function of many signaling proteins  
211 including RAS GTPases<sup>43</sup>. To determine if palmitates on CNA $\beta$ 1 actively turn over in cells,  
212 we performed a pulse-chase experiment by briefly labelling COS-7 cells expressing FLAG-  
213 CNA $\beta$ 1 with 17-ODYA and the methionine analog L-azidohomoalanine (L-AHA), followed by  
214 immunopurification and visualization of CNA $\beta$ 1, using dual-click chemistry to determine  
215 levels of 17-ODYA and L-AHA incorporation over time (Fig. 2a). In cells treated with  
216 Palmostatin B (Palm B), a pan inhibitor of depalmitoylases, the ratio of 17-ODYA/L-AHA  
217 incorporation into FLAG-CNA $\beta$ 1 increased over time relative to the control (DMSO treated)

218 cells, establishing that palmitoylation of CNA $\beta$ 1 is reversed by endogenous depalmitoylases  
219 (Fig. 2b, c).

220 In mammals, two classes of thioesterases are responsible for the removal of  
221 palmitate groups resulting in protein depalmitoylation. The soluble, acyl protein thioesterases  
222 (APT1, APT2) and the membrane associated  $\alpha/\beta$  hydrolase domain proteins (ABHDs)  
223 display substrate specificity likely due to their differential subcellular distribution<sup>43-45</sup>. Among  
224 the ABHD family, we focused on ABHD17A for which the catalytic properties and  
225 intracellular localization to the PM, Golgi and endosomes are well-characterized<sup>44</sup>. To  
226 identify which of these thioesterases regulate the palmitate turnover in CNA $\beta$ 1, we carried  
227 out metabolic labeling with 17-ODYA in COS-7 cells expressing GFP-CNA $\beta$ 1 together with a  
228 vector, ABHD17A-FLAG (WT or the catalytically impaired mutant S190A<sup>44</sup>), FLAG-APT2 or  
229 mCherry-APT1. Overexpression of ABDH17A WT, but not S190A, dramatically decreased  
230 the 17-ODYA labelling of GFP-CNA $\beta$ 1 (Fig. 2d, e), and resulted in redistribution of GFP-  
231 CNA $\beta$ 1 from the PM to the cytosol and Golgi (Fig. 2f, g). In contrast, overexpression of APT2  
232 (Fig. 2d, e) or APT1 (Supplementary Fig. 2a, b) did not alter palmitoylation of CNA $\beta$ 1  
233 suggesting that CNA $\beta$ 1 is depalmitoylated specifically by ABHD17A. Together, these data  
234 reveal that palmitoylation of CNA $\beta$ 1 is dynamic, which provides a potential mechanism to  
235 regulate its localization *in vivo*. In sum, our findings demonstrate that CNA $\beta$ 1 has cellular  
236 properties distinct from canonical CN isoforms, which led us to investigate whether this  
237 isoform has specific substrates and functions at membranes.

238

### 239 **Affinity purification and mass spectrometry identifies CNA $\beta$ 1-specific interactors**

240 Previous studies report that CNA $\beta$ 1, unlike canonical CN isoforms, does not activate or  
241 interact with NFAT<sup>22</sup>. Indeed, when FLAG-NFATC1 was co-expressed in HEK293 T-REx  
242 cell lines that inducibly express GFP, GFP-CNA $\alpha$ , GFP-CNA $\beta$ 2 or GFP-CNA $\beta$ 1,  
243 immunoprecipitation using anti-GFP antibody confirmed that NFATC1 co-purifies with CNA $\alpha$   
244 and CNA $\beta$ 2, but not with CNA $\beta$ 1. By contrast, the CNB regulatory subunit, was recovered to

245 the same extent with all three CN isoforms (Supplementary Fig. 3b). Next, to identify  
246 CNA $\beta$ 1-specific interactors which might include substrates, we turned to affinity purification  
247 coupled to mass spectrometry (AP-MS). HEK293 T-REx cell lines were developed that  
248 express either 3X FLAG-tagged-GFP, -CNA $\beta$ trunc lacking the C-terminal tail (aa 1- 423;  
249 truncated after calmodulin binding site), canonical -CNA $\beta$ 2, or -CNA $\beta$ 1 (Fig. 3a). Following  
250 immunoprecipitation, co-purifying proteins were identified using label-free, quantitative mass  
251 spectrometry and the 3X FLAG-tagged-GFP control was used to eliminate non-specific  
252 interactors. In total, 51 high confidence CN-interacting proteins (defined as those with a  
253 bayesian false discovery rate (BFDR)  $\leq$  1%) were identified (Supplementary Fig. 3a,  
254 Supplementary Table 1). As expected, some established CNA interactors, including the CNB  
255 subunit (PPP3R1) and the inhibitor RCAN3, were identified with all CNA $\beta$  constructs (Fig.  
256 3b, Supplementary Fig. 3a). Of these 51 proteins, 12 were previously identified as CN-  
257 interactors and several, including BRUCE, FAM126A and GSK3 $\beta$  contain predicted CN  
258 binding motifs (LxVP or PxlxIT) confirming the validity of our data set <sup>6,7,46</sup>.

259 Excitingly, several proteins were enriched in immunoprecipitates of CNA $\beta$ 1 relative to  
260 CNA $\beta$ 2 or CNA $\beta$ trunc (Fig. 3b). Consistent with the intracellular distribution of CNA $\beta$ 1, the  
261 majority of these were membrane-associated, including Baculoviral IAP repeat-containing  
262 protein 6 (BIRC6/BRUCE), which localizes to the Golgi and endosomes <sup>47</sup>, PM-associated  
263 Phosphorylase B kinase regulatory subunit (PHKB), cell junction protein Liprin-Beta 1  
264 (PPFIBP1) <sup>48</sup>, and endosomal SH3 and BAR domain-containing protein endophilin B2  
265 (SH3GLB2) <sup>49</sup>. And most strikingly, all subunits of the large PM-associated PI4KA complex,  
266 composed of EFR3B, FAM126A (Hyccin), TTC7B and PI4KA (PI4KIII $\alpha$ ), were identified (Fig.  
267 3b, c) <sup>29,30,32</sup>. Together, these findings suggest that CNA $\beta$ 1 interacts with a unique set of  
268 membrane-associated proteins which may represent novel CNA $\beta$ 1-regulated substrates and  
269 pathways.

270

271 **CNA $\beta$ 1 interacts with the PI4KA complex at the plasma membrane**

272 We focused our attention on the PI4KA complex, which is endogenously expressed at very  
273 low levels. To ensure the balanced expression of PI4KA complex components in our studies,  
274 we engineered a single plasmid that harbors the DNA sequences encoding EFR3B, TTC7B  
275 and FAM126A separated by the viral 2A linkers T2A and P2A, respectively (Supplementary  
276 Fig. 3d). During translation, 2A peptides are cleaved leading to the expression of each  
277 protein separately in constant stoichiometry<sup>50</sup>. Efficient cleavage of this plasmid and the  
278 proper expression of each component was verified in both HeLa (Supplementary Fig. 3f) and  
279 HEK293 cells (data not shown). Immunofluorescence analyses of HeLa cells further  
280 confirmed the expected PM localizations for EFR3B, TTC7B, FAM126A (Supplementary Fig.  
281 3e) and co-expressed PI4KA (Supplementary Fig. 5c), indicating that the complex was  
282 functional. Using this expression system, we first performed reciprocal immunoprecipitation  
283 experiments to validate the enriched interaction of the PI4KA complex with CNA $\beta$ 1  
284 compared to the canonical CNA $\beta$ 2. HEK293 T-REx cells inducibly expressing GFP-FLAG  
285 control, GFP-CNA $\beta$ 2 or GFP-CNA $\beta$ 1 were transfected with the EFR3B-HA, TTC7B-MYC,  
286 FLAG-FAM126A-containing plasmid together with GFP-PI4KA. EFR3B-HA was  
287 immunoprecipitated from cell lysates and the co-purifying proteins were analyzed. As  
288 expected, GFP-PI4KA efficiently co-purified with EFR3B indicating functional complex  
289 formation. Supporting our AP-MS results, association of GFP-CNA $\beta$ 1 with EFR3B was  
290 significantly higher than that of either GFP-CNA $\beta$ 2 or the palmitoylation defective GFP-  
291 CNA $\beta$ 1<sup>C2S</sup> (Fig. 3d, e). Thus, CNA $\beta$ 1 preferentially interacts with the PI4KA complex due to  
292 its unique PM localization, which is mediated by palmitoylation.

293

#### 294 **FAM126A has a putative PxlIT motif that mediates binding to CN**

295 Computational predictions identified a highly conserved sequence motif within the  
296 intrinsically disordered C-terminal tail of FAM126A, <sup>512</sup>PSISIT<sup>517</sup>, matching the consensus of  
297 the PxlIT motif that mediates binding to CN<sup>6,7</sup> (Fig. 4a, Supplementary Fig. 4a). To  
298 determine whether this sequence binds to CN, we first fused a 16-mer peptide containing  
299 this sequence from FAM126A to GST and tested its co-purification with the recombinant,



300 HIS-tagged CN heterodimer *in vitro*. GST fused to the PxlIT from NFATC1 was used as a  
301 positive control. As expected, the FAM126A peptide efficiently co-purified with wildtype HIS-  
302 CN but not with mutant CN (NIR) which is defective for PxlIT-docking<sup>51</sup>. Mutating key  
303 residues of the PSISIT sequence to alanine (FAM126A<sup>ASASAA</sup>), also disrupted the interaction  
304 with CN showing that this sequence mediates direct binding to CN *in vitro* (Supplementary  
305 Fig. 4b, c).

306 Next, to investigate whether FAM126A-CNA $\beta$ 1 association is PxlIT-dependent *in*  
307 *vivo*, we used proximity-dependent labeling (BioID) with the promiscuous biotin ligase, BirA\*,  
308 which sensitively detects the low affinity interactions seen between CN and substrates<sup>6,52,53</sup>.  
309 We transfected HeLa cells expressing BirA-fused CNA $\beta$ 1 with HA-PI4KA and the EFR3B-  
310 HA, TTC7B-MYC, FLAG-FAM126A-containing plasmid described above with either  
311 FAM126A<sup>WT</sup> or CN-binding-defective FAM126A<sup>ASASAA</sup>. Consistent with AP-MS results, each  
312 component of the PI4KA complex was biotinylated by BirA-fused CNA $\beta$ 1 (Fig. 4b, c) and as  
313 expected, FAM126A<sup>WT</sup> was significantly more biotinylated than FAM126A<sup>ASASAA</sup> (Fig. 4b, c).  
314 Interestingly, biotinylation of other complex members, i.e, TTC7B, PI4KA and EFR3B was  
315 also reduced in the presence of FAM126A<sup>ASASAA</sup>. In sum, these findings identify PSISIT as a  
316 direct a CN-binding motif in FAM26A and suggest that this sequence promotes interaction of  
317 CNA $\beta$ 1 with the entire PI4KA complex.

318

### 319 **Hydrogen/deuterium exchange maps CN- PI4KA complex interaction sites**

320 The cryo-EM structure of PI4KA-TTC7B-FAM126A fails to resolve the unstructured,  
321 disordered C-terminal tail of FAM126A, which contains the CN-binding motif<sup>34</sup>. Therefore,  
322 we turned to hydrogen deuterium exchange coupled to mass spectrometry (HDX-MS) to  
323 map the CN-PI4KA complex interaction and identify any conformational changes that occur  
324 upon binding<sup>35,54</sup>. HDX-MS measures the exchange rate of amide hydrogens with  
325 deuterium-containing buffer, which acts as a sensitive probe of secondary structure  
326 dynamics<sup>55</sup>. The CNA/CNB heterodimer was produced in *Escherichia coli* and recombinant  
327 PI4KA in complex with TTC7B and FAM126A was purified from insect cells as previously



328 described<sup>35</sup>. The PI4KA/TTC7B/FAM126A trimer and CNA/CNB were exposed to pulses of  
329 deuterium when incubated alone or together, with CN in excess over the PI4KA trimer (Fig.  
330 4d). Localization of differences in H/D exchange requires proteolysis into peptides, with  
331 sequence coverage for PI4KA, FAM126A, TTC7B and Calcineurin A (catalytic) and B  
332 (regulatory) subunits of 77.6%, 80.9%, 84.2%, 89% and 89.3%, respectively (Supplementary  
333 Table 2). Following addition of deuterium-containing buffer (D<sub>2</sub>O), reactions were quenched  
334 at indicated times (3s, 30s, 300s, 3000s) and the resulting shifts in mass upon deuterium-  
335 incorporation was analyzed with mass spectrometry. Peptides that showed differences in  
336 amide exchange greater than 0.5Da and 5% at any time point and had unpaired t-test values  
337 of  $p < 0.01$ , across three replicates, were considered significant.

338 Co-incubation of CNA/CNB with the PI4KA/TTC7B/FAM126A trimer resulted in a  
339 large decrease in hydrogen-deuterium exchange in the well-characterized PxlIT docking  
340 groove in CNA (aa 329-346) (Fig. 4e, f), consistent with the PxlIT-mediated interaction we  
341 demonstrated between FAM126A and CN. We also observed decreased amide exchange in  
342 the N-terminus of CNA (aa 34-36) suggesting that previously unidentified conformational  
343 changes occur upon substrate binding (Fig. 4d, f and Supplementary Fig. 4d). Interestingly,  
344 a region in CNB that forms part of the LxVP-binding groove (aa 119-129) also showed  
345 significantly decreased amide incorporation which may indicate that additional, as yet  
346 unidentified, LxVP-mediated interactions occur between the PI4KA trimer and CN (Fig. 4d, e  
347 and f). As for the PI4KA complex, while no significant changes in amide exchange were  
348 seen in TTC7B (Supplementary Fig. 4e), a few regions in both FAM126A and PI4KA showed  
349 significant changes in deuterium exchange in the presence of CNA/CNB. In FAM126A,  
350 exchange decreased significantly in the region within the C-terminal tail that contains the  
351 PSISIT sequence (aa 497-517) consistent with CN-binding to this site (Fig. 4d, g and h). In  
352 PI4KA an unstructured region within the  $\alpha$ -solenoid domain (aka the horn) (aa 536-543)  
353 showed a decrease in deuterium incorporation (Fig. 4d, g and h), indicating the formation of  
354 secondary structure either due to direct interaction with CN or as an indirect consequence of  
355 CN binding to FAM126A. Interestingly, this region contains a PxlIT-like peptide sequence,

356 "IKISVT", which may be a novel, non-canonical CN binding motif. In addition, a set of  
357 peptides identified in PI4KA between residues 1463-1492 showed increased amide  
358 exchange (Fig. 4h, Supplementary Fig. 4d, e) revealing a conformational change that occurs  
359 in the presence of CN. Overall, these studies indicate multiple sites of contact between CN  
360 and PI4KA/TTC7B/FAM126A trimer suggestive of a regulatory interaction.

361

### 362 **FAM126A is a novel CN substrate**

363 To examine whether CN regulates phosphorylation of the PI4KA complex we focused on  
364 FAM126A because of its small size (~58 kDa), the presence of a confirmed CN-binding motif  
365 and several identified sites of phosphorylation<sup>56</sup>. First, we expressed FLAG-FAM126A<sup>WT</sup> or  
366 CN-binding defective FAM126A<sup>ASASAA</sup>, alone or together with TTC7B-MYC and EFR3B-HA  
367 and examined their electrophoretic mobility via SDS-PAGE and immunoblot analysis. Slower  
368 migrating forms of FAM126A were observed that were enhanced in FAM126A<sup>ASASAA</sup>  
369 compared to FAM126A<sup>WT</sup> (labelled PI and PII in Fig. 5a, lane 2 vs 5). Notably, these shifts  
370 were present only when FAM126A was co-expressed with the other components (Fig. 5a,  
371 lane 1 vs 2 or lane 4 vs 5), especially EFR3B, the membrane anchor for the complex<sup>30</sup>  
372 (Supplementary Fig. 5a). These slower migrating forms, indicative of hyperphosphorylation,  
373 suggest that that FAM126A is phosphorylated only when associated with the PM-localized  
374 PI4KA complex, and that CN dephosphorylates FAM126A in a PxlIT-dependent manner.  
375 To further analyze FAM126A phospho-regulation, we mutated several serine and threonine  
376 residues observed to be phosphorylated<sup>56</sup> to the non-phosphorylatable amino acid alanine.  
377 Remarkably, mutating serine 485 (FAM126A<sup>S485A</sup>) altered mobility shifts in FAM126A,  
378 eliminating PII and reducing PI (Fig. 5a, lane 2 vs 3 and lane 5 vs 6). This suggests that  
379 Ser485 is one target of phosphorylation and that additional sites likely contribute to the  
380 observed shifts. To analyze the phosphorylation status of Ser485 in FAM126A, we  
381 generated a phospho-specific antibody for this site (anti-pFAM126A S485). The specificity of  
382 this antibody is demonstrated by analyses of HeLa cells expressing FAM126A mutants  
383 (S485A, ASASAA or ASASAA+S485A) with or without EFR3B and TTC7B co-expression,

384 where this antibody specifically recognized both slower-migrating FAM126A forms (PI and  
385 PII, Fig. 5a). Notably, no signal was detected for FAM126A<sup>S485A</sup> or when FAM126A was  
386 expressed alone, and the total signal was significantly higher for FAM126A<sup>ASASAA</sup> compared  
387 to FAM126A<sup>WT</sup>. Moreover, indirect immunofluorescence using anti-pFAM126A S485  
388 antibody showed enriched signal at the PM, further indicating that FAM126A is  
389 phosphorylated when the PI4KA complex is associated with the PM (Supplementary Fig.  
390 5b).

391 Next, we used anti-pFAM126A S485 to probe FAM126A phosphorylation in cells  
392 under different signaling conditions. Although direct phosphorylation of the PI4KA complex  
393 has not been demonstrated, a recent study identified PKC as a possible regulator of this  
394 complex and showed that PMA activates PI4P production at the PM which is blocked by  
395 BIM, a PKC inhibitor<sup>28</sup>. Therefore, we monitored FAM126A phosphorylation with anti-  
396 pFAM126A S485 under similar conditions by treating cells that co-expressed FLAG-  
397 FAM126A (WT or ASASAA mutant), TTC7B and EFRB upon treatment with combinations of  
398 a CN inhibitor (FK506), a PKC activator (PMA) and a PKC inhibitor (BIM). By examining the  
399 total intensity of anti-pFAM126 S485 signal (forms PI and PII), we made the following  
400 observations (Fig. 5c): first, for cells expressing FAM126A<sup>WT</sup>, addition of FK506 significantly  
401 increased Ser485 phosphorylation under all conditions (alone or together with PMA,  
402 PMA+BIM). Second, compared to FAM126A<sup>WT</sup>, cells expressing FAM126A<sup>ASASAA</sup> showed  
403 higher levels of Ser485 phosphorylation under all conditions and inhibiting CN with FK506  
404 had no further effect as expected for this CN-binding impaired mutant. Together, these  
405 findings show that S485 phosphorylation is CN-regulated. Furthermore, addition of PMA did  
406 not enhance S485 phosphorylation. Next, we focused on shifts in electrophoretic mobility of  
407 FAM126A (Fig. 5b). Interestingly, for both FAM126A proteins (WT and ASASAA mutant),  
408 treatment with PMA caused an electrophoretic shift from the dephosphorylated form (deP) to  
409 PI, likely due to phosphorylation of residues other than Ser485. Importantly, this PMA-  
410 induced shift was suppressed by BIM. In sum, these findings demonstrate PxlXIT-dependent  
411 regulation of FAM126A phosphorylation at Ser485 by CN *in vivo* and establish FAM126A as

412 a novel CN substrate. These data also reveal PMA-induced phosphorylation of FAM126A, at  
413 a distinct site, likely by PM-localized PKC, which might be the molecular basis of the  
414 reported regulatory role for PKC in PM PI4P synthesis <sup>28</sup>.

415

#### 416 **CN regulates PI4P synthesis by the PI4KA complex**

417 Having shown that CN interacts with the PI4KA complex and that FAM126A is a CN  
418 substrate, we next investigated whether CN regulates the assembly and/or activity of this  
419 complex. First, we examined interaction of the cytosolic heterotrimer,  
420 PI4KA/TTCB/FAM126A, with the membrane anchor EFR3B in the presence of FAM126A<sup>WT</sup>  
421 or CN-binding defective FAM126A<sup>ASASAA</sup>. Immunopurification of EFR3B-HA showed the  
422 same levels of co-purifying GFP-PI4KA, TTC7B-MYC or FLAG-FAM126A with FAM126A<sup>WT</sup>  
423 or FAM126A<sup>ASASAA</sup> (Fig. 6a, b). Furthermore, indirect immunofluorescence analyses of these  
424 cells verified that each component, especially GFP-PI4KA, localized to the PM with either  
425 FAM126A<sup>WT</sup> or FAM126A<sup>ASASAA</sup>, indicating that the complex formed properly (Supplementary  
426 Fig. 5c). These findings suggest no CN-dependent regulation of complex formation via  
427 FAM126A.

428         Next, we explored whether CN regulates PM PI4P synthesis carried out by the  
429 PI4KA complex using a previously established bioluminescence resonance energy transfer  
430 (BRET) assay that monitors PI4P levels at the PM in live cells during signaling <sup>28</sup>. For this  
431 assay, the energy donor (luciferase) is fused to the PI4P binding domain, P4M, of the  
432 *Legionella* SidM protein <sup>57</sup>, the energy acceptor (Venus) is attached to the PM-targeting  
433 sequence from Lck (first ten amino acids, L10) (Fig. 6c), and both proteins are expressed in  
434 HEK293 cells that express the Gq-coupled muscarinic receptor, M<sub>3</sub>R. As previously  
435 reported, PM PI4P levels transiently increased in control cells (blue lines, Fig. 6d) following  
436 addition of the M<sub>3</sub>R ligand, carbachol (10<sup>-7</sup> M), due to activation of the PI4KA complex <sup>28</sup>.  
437 Excitingly, pre-treatment of these cells with CN inhibitors, FK506 (1 μM) or CsA (10 μM),  
438 significantly reduced the level of PI4P produced (red lines, Fig. 6d) consistent with our  
439 hypothesis that CN regulates PI4KA complex activity under Ca<sup>2+</sup> signaling conditions.

440 In summary, our findings lead us to propose the following model: Signaling from a  
441 Gq-coupled GPCR generates an intracellular  $\text{Ca}^{2+}$  signal that activates CN, and likely PKC,  
442 which in turn stimulate the PI4KA complex at the PM to promote the PI4P replenishment and  
443 thus generating the  $\text{PI}(4,5)\text{P}_2$  pools required for sustained signaling (Fig. 6e). Our work  
444 highlights  $\text{CNA}\beta 1$  as a newly identified interaction partner of the PI4KA complex, shows that  
445 CN inhibitors alter PI4P production at the PM during signaling, and warrants further  
446 investigation into the phosphorylation state of complex components, especially FAM126A  
447 and PI4KA, through which CN might be regulating PI4KA activity.

448

#### 449 **Discussion:**

450 In this study we aimed to discover CN signaling pathways that are regulated by the naturally  
451 occurring but understudied CN isoform,  $\text{CNA}\beta 1$ , which is conserved among vertebrates and  
452 broadly expressed<sup>13,14,15</sup>. This isoform differs from canonical  $\text{CNA}\beta 2$  only in its 40 C-terminal  
453 residues<sup>14</sup>, which confer distinct enzymatic regulation to  $\text{CNA}\beta 1$  through an LxVP-type  
454 autoinhibitory sequence (LAVP), that we previously characterized<sup>15</sup>. Here we show that the  
455  $\text{CNA}\beta 1$  tail is dually palmitoylated, making  $\text{CNA}\beta 1$  the only known form of CN that directly  
456 associates with the PM and Golgi. By contrast, canonical CN isoforms access only select  
457 PM proteins that either contain CN binding sites in their cytosolic domains (e.g. NHE1,  
458 TRESK)<sup>58,59</sup> or associate with membrane-anchored scaffolds such as AKAP79<sup>60</sup>. This  
459 unique localization determines  $\text{CNA}\beta 1$  substrate specificity including its interaction with all  
460 four members of the protein complex that synthesizes the critical phospholipid, PI4P at the  
461 PM. We demonstrate that FAM126A, the regulatory component of this complex, is  
462 phosphorylated at the PM, directly binds CN, and contains at least one CN-regulated  
463 phosphorylation site. These findings led us to discover a hitherto unknown role for CN in  
464 regulating PI4P synthesis at the PM during GPCR signaling. The  $\text{CNA}\beta 1$  isoform is ideally  
465 positioned to carry out this regulation.

466 Our finding that CNA $\beta$ 1 is dynamically palmitoylated has several interesting  
467 implications for its regulation *in vivo*. First, the ability of CNA $\beta$ 1 to access membrane-  
468 associated substrates and hence carry out its functions may be controlled by the palmitoyl  
469 transferases (DHHCs) and depalmitoylases that act on it, as has been shown for other  
470 signaling enzymes including RAS and LCK<sup>61,62</sup>. Second, we speculate that the  
471 palmitoylation-driven binding of the autoinhibitory CNA $\beta$ 1 tail to membranes may be  
472 necessary to fully activate this variant which is only partially activated by Ca<sup>2+</sup> and CaM *in*  
473 *vitro*<sup>15</sup>. Thus, examining the enzymes that modify CNA $\beta$ 1 lipidation will be key for  
474 understanding how CNA $\beta$ 1 is controlled physiologically. Here we show that a membrane-  
475 localized thioesterase ABHD17A, which regulates H/N-RAS<sup>44</sup>, also catalyzes the  
476 depalmitoylation of CNA $\beta$ 1 causing it to redistribute from the PM to the cytosol and the  
477 Golgi. However, mechanisms that control the activity of ABHD17A are yet to be identified.  
478 Furthermore, determining which of the 23 DHHCs encoded in human genome act on CNA $\beta$ 1  
479 may provide insights into where and when palmitoylation takes place, as these enzymes  
480 exhibit distinct patterns of localization and regulation<sup>63</sup>. In sum, our findings lay the  
481 groundwork for further investigation into the role of dynamic palmitoylation in controlling  
482 CNA $\beta$ 1 localization and/or enzymatic activity, which may also provide tools to specifically  
483 regulate its functions.

484 Our investigations are the first to identify CN as a regulator of the PI4KA complex  
485 composed of PI4KA, TTC7, FAM126A and EFR3, and highlight major gaps in our knowledge  
486 of how this important complex is regulated. Production and maintenance of PM PI4P levels  
487 are physiologically critical as evidenced by the wide range of diseases caused by mutations  
488 in complex components ranging from neurological (PI4KA), immune and gastrointestinal  
489 (TTC7) defects, to hypomyelination and congenital cataracts (FAM126A)<sup>30,34</sup>.  
490 Phosphorylation regulates assembly of the PI4KA complex in yeast; however, in mammals,  
491 little is known about how the assembly or the activity of this complex is modulated. Our  
492 interaction studies, including HDX-MS analysis, uncovered potential contacts between CN



493 and multiple PI4KA complex members, and confirmed direct binding to a PxlIT motif in the  
494 C-terminal tail of FAM126A. This tail is completely unstructured and shows no interaction  
495 with TTC7 or PI4KA<sup>30</sup>, but inhibits PI4KA activity *in vitro* through an unknown mechanism<sup>35</sup>.  
496 Our results provide the first insights into this regulation by demonstrating that CN binds to  
497 and modulates the phosphorylation of at least one site in the FAM126A tail (Ser485) in cells.  
498 Further studies are required to comprehensively map CN-regulated phosphosites in PI4KA  
499 complex members, identify relevant PM-associated kinases, and to assess the functional  
500 consequences of these modifications.

501         Lastly, our discovery that CN inhibitors reduce PI4P production at the PM induced  
502 during Ca<sup>2+</sup> signaling from Gq-coupled GPCRs suggests that a positive feedback loop exists  
503 through which PKC and CN (presumably CNAβ1), regulate the phosphorylation of the PI4KA  
504 complex to stimulate its activity and ensure a continued supply of the precursor PI(4,5)P<sub>2</sub>  
505 (Fig. 6e). Evidence for PKC involvement in this stimulation<sup>28</sup> is consistent with the CN-  
506 independent, PKC-regulated phosphorylation-shift we observed in FAM126A (Fig. 5b).  
507 Rigorously testing this model, however, is extremely challenging due to the complete lack of  
508 knowledge about how this large, minimally expressed complex that apparently undergoes  
509 extensive allosteric rearrangements<sup>35</sup>, is regulated in cells. To date, our attempts to identify  
510 changes in PI4P levels or synthesis rates caused by mutations in the FAM126A PxlIT site  
511 or Ser485 have been unsuccessful using overexpression of the proteins (data not shown).  
512 This could be due to limitations in the experimental set up (HEK293 cells overexpressing all  
513 PI4KA complex members), or because solely altering FAM126A may not be sufficient to  
514 perturb CN-dependent regulation of the complex. Regardless, our work breaks new ground  
515 by establishing that CNAβ1 preferentially interacts with the PI4KA complex at the PM and by  
516 suggesting FAM126A as the first substrate for CNAβ1.

517         Insights into the physiological functions of CNAβ1 come from studies that  
518 overexpress or more recently, delete the CNAβ1 isoform in mice. These knock-out mice are  
519 viable, but develop cardiac hypertrophy, possibly due to disruptions in mTORC2/AKT

520 signaling and serine one-carbon metabolism<sup>24</sup>. However, the precise molecular  
521 mechanisms underlying these pathologies and whether any of these phenotypes relate to  
522 PI4KA complex regulation remain to be determined. Notably, some reports indicate that  
523 mTORC2 activity toward AKT takes place at the PM and depends on the PH-domain  
524 containing targeting subunit, mSIN1, which binds to phosphoinositides<sup>64-66</sup>. Furthermore, the  
525 interactors identified here suggest that CNA $\beta$ 1 regulates multiple substrates throughout the  
526 body. Comprehensive identification of these targets as well as the regulatory mechanisms  
527 that control CNA $\beta$ 1 activity *in vivo* promise to shed new light on Ca<sup>2+</sup> and CN-regulated  
528 pathways and their possible perturbation in patients undergoing long term treatment with CN  
529 inhibitors, CsA or FK5006/Tacrolimus.

530

## 531 **Methods**

532

533 **Sequence alignments:** ClustalW was used to create all sequence alignments using  
534 Jalview. The following species are used in Fig. 1b: *Homo sapiens* (human, Q5F2F8), *Pan*  
535 *troglydotes* (chimpanzee, A0A2J8NUG2), *Sus scrofa* (pig, A0A480QFW6), *Desmodus*  
536 *rotundus* (Bat, K9ISS2), *Mus musculus* (mouse, Q3UXV4), *Callorhinchus milii* (ghost shark,  
537 V9KGC1) and *Xenopus tropicalis* (western clawed frog, A0A6I8R6A9). The following species  
538 are used for Supplementary Fig. 4a: *Homo sapiens* (human, Q9BYI3), *Gorilla gorilla* (gorilla,  
539 A0A2I2YR80), *Macaca mulatta* (monkey, H9ZEG3), *Sus scrofa* (pig, I3LJX1), *Felis catus*  
540 (cat, M3WEC3), *Bos taurus* (bovine, E1BFZ6), *Mus musculus* (mouse, Q6P9N1), *Gallus*  
541 *gallus* (chicken, Q5ZM13), *Xenopus tropicalis* (western clawed frog, F7EHL4), *Callorhinchus*  
542 *milii* (ghost shark, A0A4W3JDV9), *Danio rerio* (zebrafish, Q6P121).

543

## 544 **Cell culture and transfection**

545 HeLa, COS-7 and HEK 293T cells were grown at 37 °C in a 5% CO<sub>2</sub> atmosphere in cell  
546 culture medium (Dulbecco's modified Eagle's medium (CA 10-013, Sigma-Aldrich)



547 supplemented with 10% fetal bovine serum (FBS, Benchmark™ Gemini Bio Products). HEK  
548 293 inducible cell lines were generated by transfection of Flp-In T-REx parental cells  
549 (obtained from the Gingras Lab) with flippase (pOG44) and indicated plasmids in the  
550 pCDNA5/FRT vector, followed by selection using 200 µg/ml hygromycin B (Sigma-Aldrich).  
551 HEK 293 Flp-In T-REx cell lines were maintained in cell culture medium supplemented with  
552 200 µg/ml hygromycin B, 3 µg/ml blasticidin S Hydrochloride (RPI) and induced with 10ng/ml  
553 doxycycline (Sigma-Aldrich). HEK 293T and HeLa cells were gifts from the Skotheim lab.  
554 COS-7 cells were purchased from ATCC (CRL-1651). Cells were transfected as indicated in  
555 each experiment using jetOPTIMUS (VWR) as per the manufacturer`s instructions.

556

## 557 **Plasmids**

558 DNAs encoding the human CNAβ1(1-496), CNAβ2(1-524) were subcloned into a pcDNA5  
559 expression vector which encodes an N-terminal FLAG tag or GFP tag. FAM126A cDNA  
560 received from Addgene, was subcloned into pcDNA5 with N-terminal FLAG tag, between  
561 BamHI and XhoI sites. Variants of CNAβ1 (CNAβ1<sup>C483S</sup>, CNAβ1<sup>C493S</sup> CNAβ1<sup>C2S</sup>) and  
562 FAM126A (FAM126A<sup>ASASAA</sup>, FAM126A<sup>S485A</sup>, FAM126A<sup>ASASAA+S485A</sup>) were generated using the  
563 Quickchange (Agilent) site-directed mutagenesis kit. Plasmids containing the DNA encoding  
564 ABHD17A (WT and S190A mutant), APT1, APT2 and Venus-RIT were gifts from the  
565 Conibear lab. CNA/CNB plasmid (residues 2-391 of human CNA alpha isoform and human  
566 CNB isoform 1) tandemly fused in pGEX6P3 (which encodes N -terminal GST tag) for  
567 protein purification and use in HDX-MS experiments were cloned as described before<sup>6</sup>. 6x  
568 His-CNA (residues 1-391 of human CNA alpha isoform and human CNB isoform 1 tandemly  
569 fused in, p11 vector) used in in vitro peptide binding assays, was cloned as described  
570 before<sup>21</sup> His-CN NIR (<sup>330</sup>NIR<sup>332</sup> -AAA mutations) generated using site-directed mutagenesis  
571 using His-CN WT as template. Plasmids encoding human PI4KIIIα were gifts of the Balla  
572 lab. Plasmids encoding human EFR3B and TTC7B, both C-terminally tagged, were gifts of  
573 the De Camilli lab. EFR3BHA\_T2A\_TTCBMYC (or GFP)\_P2A\_FLAG FAM126A plasmid

574 was generated in between HindIII and NotI site of pcDNA3.1 vector. The DNA sequence that  
575 encodes viral T2A (GSGEGRGSLTTCGDVEENPGP) was subcloned to the 5' end of the  
576 EFR3B-HA sequence, TTC7B-MYC was then subcloned in frame to the T2A sequence.  
577 FLAG-FAM126A with DNA sequence encoding for P2A (GSGATNFSLLKQAGDVEENPGP)  
578 was cloned in frame, at the 5' end of the TTC7B-MYC sequence.

579

## 580 **Antibodies**

581 Antibodies used in each experiment are listed for each methods section with their working  
582 dilutions listed in parentheses. The phosphospecific antibody against Serine 485 site in  
583 FAM126A was manufactured by 21st Century Biochemicals as follows: A peptide  
584 corresponding to the sequence Hydrazine-Ahx-ANRFSAC[pS]LQEEKLI-amide was  
585 manufactured by Fmoc chemistry, HPLC purified to >90%, and its mass and sequence were  
586 verified by nanospray MS and CID MS/MS, respectively. The peptides, along with carrier  
587 proteins and adjuvant, were injected into New Zealand White rabbits using an initial CFA  
588 injection, followed by IFA injections. A production bleed was then taken from each of the  
589 rabbits. Sera were passed multiple times over a hydrazine reactive resin which was linked to  
590 the immunogen peptides, then rinsed with both salt and phosphate buffers. The antibody  
591 fractions were collected using an acidic elution buffer and immediately neutralized before a  
592 two-stage dialysis into PBS buffer, pH 7.2. The antibody concentration was determined  
593 using a spectrophotometer (A280). The purified antibodies were then passed multiple times  
594 over a hydrazine reactive resin, which is linked with the unmodified peptides (those not  
595 injected). These immunodepletion steps were done to remove any non-specific/phospho-  
596 independent antibodies. The final antibodies were then buffered in a PBS/50% glycerol  
597 buffer, pH 7.2 and the final concentration was calculated using a spectrophotometer (A280).

598

## 599 **Immunofluorescence, microscopy and image analysis**

600 HeLa or COS-7 cells were grown on 12 mm, #1.5H glass coverslips (ThorLabs). 24 h post-  
601 transfection, cells were washed with 1X PBS and fixed in 4% paraformaldehyde (PFA)

602 solution (diluted from 16% PFA, Electron Microscopy Sciences) in PBS for 15 min. Cells  
603 were washed thrice with PBS and permeabilized for 5 min in block buffer (1x PBS with 0.2 M  
604 Glycine, 2.5% FBS) with 0.1% Triton X-100. Cells were then incubated in block buffer  
605 without detergent for 30 min. Coverslips were incubated with primary antibodies diluted in  
606 block buffer (without detergent) for 1 h, washed multiple times with 1x PBS followed by  
607 incubation with secondary antibodies for 1 h at room temperature. Coverslips were washed  
608 again and mounted using Prolong Diamond Antifade mountant (Thermo Fisher). Images  
609 were acquired on a single z-plane on Lionheart™ FX automated widefield microscope with a  
610 20X Plan Fluorite WD 6.6 NP 0.45 objective. For Fig. 1e and Supplementary Fig. 1e, primary  
611 antibodies used: mouse anti-FLAG, M2 (1:500, Sigma-Aldrich, F1804) and rabbit anti-  
612 GM130, D6B1 (1:400, Cell Signaling Technologies, 12480). Secondary antibodies used:  
613 Anti-mouse Alexa Fluor 647 (1:500, Invitrogen) and anti-rabbit Brilliant Violet 421 (1:100,  
614 Biolegend). YFP (500 nm), Texas Red (590 nm) and DAPI (350 nm) filter cubes were used  
615 to image Venus, FLAG and GM130 respectively. For Fig. 2f: GFP (465 nm), Texas Red and  
616 DAPI filter cubes were used to image GFP, FLAG and GM130, respectively.

617

618 Image analysis: Image analyses were performed in ImageJ, FIJI. The EzColocalization  
619 plugin for FIJI was used for co-localization analysis in Fig. 1f and Supplementary Fig. 1f to  
620 determine the Pearson correlation coefficients<sup>67</sup>. For PM localization, a binary mask was  
621 generated from the thresholded Venus-RIT channel and saved as a selection (outer) to  
622 measure total signal intensity cell. The second mask was produced by five iterations of  
623 erosion function and subtracted from the outer mask using image calculator. The resulting  
624 mask (Supplementary Fig. 1d) was converted to a selection and used to measure the PM  
625 signal intensity.

626

### 627 **Detergent-assisted subcellular fractionation**

628 COS-7 cells were seeded onto 60 mm plates and transfected with FLAG-CNAβ2, FLAG-  
629 CNAβ1 (WT or C483S, C493S, C483/C493S) or EFR3B-FLAG at 80% confluency. 48 h post

630 transfection, cells were rinsed, harvested and pellets were snap-frozen in liquid nitrogen.  
631 Pellets were resuspended in 200  $\mu$ l digitonin buffer (10 mM HEPES pH 6.8, 100 mM NaCl,  
632 300 mM sucrose, 3 mM MgCl<sub>2</sub>, 5 mM EDTA and 0.015% Digitonin) supplemented with  
633 protease inhibitors by pipetting up and down followed by rotating at 4°C for 15 min. Input  
634 (6%) was taken as input prior to centrifugation at 2,000g for 20 min. The supernatant was  
635 carefully removed and spun at 16,000g for 5 min to remove any contamination from the  
636 pellet fraction. The supernatant was saved as the cytosol fraction. The pellet was washed 2x  
637 with ice-cold PBS and resuspended in 200  $\mu$ l Triton X-100 buffer (HEPES pH 7.5, 100 mM  
638 NaCl, 300 mM sucrose, 3 mM MgCl<sub>2</sub>, 3 mM EDTA, 1% Triton X-100) supplemented with  
639 protease inhibitors. Pellets were lysed for 30min by rotating at 4°C followed centrifugation at  
640 7,000g for 10 min. Supernatant saved as the membrane fraction. The clarified supernatant is  
641 saved as the cytosol fraction. Inputs and equal volumes (6%) of the cytosol and membrane  
642 fractions were mixed with 6X SDS sample buffer, heated to 95°C for 5 min and resolved by  
643 SDS-PAGE followed by western blotting. Primary antibodies used: anti-FLAG (1:2,500;  
644 Sigma F3165), rabbit anti-calnexin (1:3,000 ADI-SPA-865, Enzo Life Sciences) and anti-  
645 Gapdh (1:20,000, 1E6D9, Proteintech). After incubation with secondary Li-Cor antibodies,  
646 blots were imaged with the Li-Cor Odyssey imaging system. Enrichment in cytosol fraction  
647 was quantified as FLAG signal /Gapdh signal in cytosol fraction normalized to FLAG  
648 signal/Gapdh signal in Inputs. Similarly for membrane enrichment, FLAG signal /Calnexin  
649 signal in membrane fraction normalized to FLAG signal / Calnexin signal in Input. Statistical  
650 analysis was performed using GraphPad.

651

### 652 **Acyl-Resin Assisted Capture (Acyl-RAC)**

653 The acyl-RAC protocol was performed as described previously<sup>40</sup> with minor changes. In  
654 brief, COS-7 cells were seeded on 60mm plates and transfected at 70% confluency with  
655 FLAG-CNA $\beta$ 2, FLAG-CNA $\beta$ 1 (WT or C483S, C493S, C483/C493S) or EFR3B-FLAG using  
656 JetOptimus. 48 hours following transfection, cells were harvested in ice-cold PBS and snap  
657 frozen in liquid nitrogen. Pellets were lysed in TAE lysis buffer (50 mM TEA pH 7.3, 150 mM

658 NaCl, 2.5% SDS) supplemented with 1 mM PMSF and protease inhibitors, vortexed briefly  
659 and incubated at 37°C for 20 min with constant gentle agitation. Lysates were subjected to  
660 fine needle aspiration with sterile 27.5-gauge needle and clarified by centrifugation (16,000g  
661 for 20 min). 400 µg of each lysate was diluted to 2 mg/ml with lysis buffer and incubated  
662 with 10 mM TCEP (646547, Sigma-Aldrich) for 30 min, nutating at room temperature. 25 mM  
663 NEM (N-ethylmaleimide, 40526, Alfa Aesar) was then added to the mix and incubated by  
664 gentle mixing at 40°C for 2 h to block free thiols. NEM was removed by acetone precipitation  
665 by adding four volumes of ice-cold acetone. Proteins were allowed to precipitate at -20°C  
666 overnight. Following centrifugation of the solution at 16,000g for 15 min, the pellets were  
667 extensively washed with 70% acetone and the pellets were airdried for 5 min at room  
668 temperature. Pellets were resuspended in 200 µl of binding buffer (50 mM TEA pH 7.3, 150  
669 mM NaCl, 1 mM EDTA, 1% SDS, 0.2% Triton X-100) by heating at 40°C with frequent  
670 mixing. Approximately 20 µl from each sample was taken as input and the rest were split into  
671 two 1.5-ml microcentrifuge tubes. To capture S-palmitoylated proteins, 40 µl prewashed  
672 thiopropyl Sepharose 6b (T8387, Sigma-Aldrich, prepared fresh) was added to samples in  
673 the presence of either 0.75 M NH<sub>2</sub>OH (from 2.5 M stock, pH 7.5, freshly diluted from  
674 Hydroxylamine solution (467804, Sigma-Aldrich)) or binding buffer (without SDS and EDTA  
675 for the negative control). Binding reactions were carried out on a rotator at 30°C for 4 h.  
676 Resins were washed 4-5x with binding buffer, 5 min each, and proteins were eluted in 30 µl  
677 binding buffer supplemented with 50 mM DTT shaking at 30°C for 30 min. 6x SDS sample  
678 buffer was added to the samples followed by heating to 95°C for 5 min. Inputs and eluates  
679 were separated by SDS-PAGE and transferred to nitrocellulose for Western blotting with  
680 mouse anti- FLAG (1:2,500; Sigma F3165) and rabbit anti-calnexin (1:3,000 ADI-SPA-865,  
681 Enzo Life Sciences) antibodies. After incubation with secondary Li-Cor antibodies, blots  
682 were imaged with the Li-Cor Odyssey imaging system.

683

684 **Acyl-PEG Exchange (APE)**

685 COS-7 cells were transfected, lysed, and subjected to reductive alkylation with TCEP and  
686 NEM as described in Acyl-RAC protocol. Following alkylation of total lysate (300-400  $\mu$ g)  
687 proteins were precipitated with four volumes of ice-cold Acetone at -20°C overnight. The  
688 pellets were washed extensively with 70% Acetone and air dried for 5min. The pellets were  
689 resuspended in 72  $\mu$ l TEA buffer pH 7.3, with 4% SDS (50 mM TEA, 150 mM NaCl, 0.2%  
690 Triton X-100, 4 mM EDTA) by heating to 40°C for an hour with constant mixing. Lysate was  
691 clarified by centrifugation at 16,000g for 5 min. Approximately 7  $\mu$ l (10%) from each sample  
692 was removed as input, the rest was split into two 30  $\mu$ l aliquots. For NH<sub>2</sub>OH treated sample,  
693 36 $\mu$ l NH<sub>2</sub>OH (2.5 M stock) was added and brought up to 120  $\mu$ l with TEA buffer with 0.2%  
694 Triton X-100 (50 mM TEA, 150 mM NaCl). For negative control not treated with NH<sub>2</sub>OH, 90  
695  $\mu$ l TEA buffer with 0.2% Triton X-100 was added. After incubation at 30°C for 1 h on a  
696 rotator, proteins were precipitated using methanol-chloroform-H<sub>2</sub>O, briefly air dried and  
697 resuspended in 30  $\mu$ l TEA buffer with 4% SDS, 50 mM TEA, 150 mM NaCl, 0.2% Triton X-  
698 100, 4 mM EDTA by gentle mixing at 40°C. Each sample was treated with 90  $\mu$ l TEA buffer  
699 with 1.33 mM mPEG-Mal (Methoxypolyethylene glycol maleimide, 5 kDa, 63187 Sigma-  
700 Aldrich) for a final concentration of 1 mM mPEG-Mal. Samples were incubated for 2h at RT  
701 with nutation before a final methanol-chloroform-H<sub>2</sub>O precipitation. The pellets were  
702 resuspended in 50  $\mu$ l TAE lysis buffer (50 mM TEA pH 7.3, 150 mM NaCl, 2.5% SDS) and  
703 10  $\mu$ l 6X SDS sample buffer was added before heating the sampled for 5min at 95°C.  
704 Typically 14 $\mu$ l of each sample was separated by SDS-PAGE and analyzed by western blot  
705 with FLAG and Calnexin antibodies. After incubation with secondary Li-Cor antibodies, blots  
706 were imaged with the Li-Cor Odyssey imaging system.

707

#### 708 **Pulse-chase metabolic labeling with Palmostatin B**

709 COS-7 cells were transfected with cDNA encoding FLAG-CNA $\beta$ 1 using Lipofectamine 2000  
710 as per manufacturer's instructions. Twenty hours following transfection, cells were washed in  
711 phosphate-buffered saline (PBS) and starved in methionine-free DMEM containing 5%  
712 charcoal-filtered FBS (Life Technologies), supplemented with 1 mM L-glutamine and 1 mM



713 sodium pyruvate for 1 h. Cells were then briefly washed in PBS then labeled with 30  $\mu$ M 17-  
714 ODYA and 50  $\mu$ M L-AHA for 2 h in this media. Labelling media was removed, cells were  
715 washed twice in PBS before chasing in complete DMEM supplemented with 10% FBS and  
716 300  $\mu$ M palmitic acid. Palmostatin B (Palm B) or DMSO (vehicle) were added at chase time  
717 0 and Palm B was replaced every hour. At indicated time points, cells were washed twice in  
718 PBS and frozen at  $-80^{\circ}\text{C}$  until processing. Cells were lysed with 500  $\mu$ l triethanolamine  
719 (TEA) lysis buffer (1% Triton X-100, 150 mM NaCl, 50 mM TEA pH 7.4, 100xEDTA-free Halt  
720 Protease Inhibitor [Life Technologies]). The lysates were transferred to 1.5-ml Eppendorf  
721 tubes (Corning), vigorously shaken while placed on ice in between each agitation. Lysates  
722 were cleared by centrifugation at 13,000 g for 15 min at  $4^{\circ}\text{C}$ . Solubilized proteins in the  
723 supernatant were quantified using Bicinchoninic acid (BCA) assay (Life Technologies),  
724 650 $\mu$ g-1mg of the lysate was added to Protein A-Sepharose beads (GE Healthcare) pre-  
725 incubated for 3-7 h with rabbit anti-FLAG antibody (Sigma-Aldrich) at  $4^{\circ}\text{C}$ .  
726 Immunoprecipitations were carried out overnight rotating at  $4^{\circ}\text{C}$ .

727

728 Sequential on-bead CuAAC/click chemistry: Sequential on-bead click chemistry of  
729 immunoprecipitated 17-ODYA/L-AHA-labeled proteins was carried out as previously  
730 described<sup>44</sup> with minor modifications. After immunoprecipitation, Sepharose beads were  
731 washed thrice in RIPA buffer, and on-bead conjugation of AF647 to 17-ODYA was carried  
732 out for 1 h at room temperature in 50  $\mu$ l of freshly mixed click chemistry reaction mixture  
733 containing 1 mM TCEP, 1 mM  $\text{CuSO}_4 \cdot 5\text{H}_2\text{O}$ , 100  $\mu$ M TBTA, and 100 mM AF647-azide in  
734 PBS. After three washes in 500  $\mu$ l ice-cold RIPA buffer, conjugation of AF488 to L-AHA was  
735 carried out for 1 h at room temperature in 50  $\mu$ l click-chemistry reaction mixture containing 1  
736 mM TCEP, 1 mM  $\text{CuSO}_4 \cdot 5\text{H}_2\text{O}$ , 100  $\mu$ M TBTA, and 100 mM AF488-alkyne in RIPA buffer.  
737 Beads were washed thrice with RIPA buffer and resuspended in 10  $\mu$ l SDS buffer (150 mM  
738 NaCl, 4% SDS, 50 mM TEA pH7.4), 4.35  $\mu$ l 4X SDS-sample buffer (8% SDS, 4%  
739 Bromophenol Blue, 200 mM Tris-HCl pH 6.8, 40% Glycerol), and 0.65  $\mu$ l 2-mercaptoethanol.  
740 Samples were heated for 5 min at  $90^{\circ}\text{C}$  and separated on 10% tris-glycine SDS-PAGE gels

741 for subsequent in-gel fluorescence analyses. A Typhoon Trio scanner (GE Healthcare) was  
742 used to measure in-gel fluorescence of SDS-PAGE gels: AF488 signals were acquired  
743 using the blue laser (excitation 488 nm) with a 520BP40 emission filter, AF647 signals were  
744 acquired using the red laser (excitation 633 nm) with a 670BP30 emission filter. Signals  
745 were acquired in the linear range and quantified using the ImageQuant TL7.0 software (GE  
746 Healthcare). For pulse-chase analyses, the ratio of palmitoylated substrates:total newly  
747 synthesized substrates were calculated as AF647/AF488 values at each time point,  
748 normalized to the value at T=0.

749

### 750 **Determination of CNA $\beta$ 1 palmitoylation in the presence of thioesterases**

751 COS-7 cells were seeded onto 60mm plates and transfected with GFP- CNA $\beta$ 1 together with  
752 vector, ABHD17A-FLAG (WT or S190A mutant), FLAG-APT2 or mCherry-APT1. 24 h post-  
753 transfection, media was replaced with DMEM containing 2% FBS and labelled with 30  $\mu$ M  
754 17-ODYA (17-Octadecynoic Acid,34450, Cayman Chemicals) or DMSO for 3hr at 37°C  
755 incubator. Cells for rinsed thrice with ice-cold PBS, harvested and pellets were snap-frozen  
756 in liquid nitrogen. Pellets were then lysed in TEA lysis buffer ( 50 mM TEA pH 7.4, 150 mM  
757 NaCl, 1% Triton X-100, 1 mM PMSF) supplemented with protease inhibitors by rotating for  
758 20min at 4°C. Lysates were subjected to fine-needle aspiration using sterile 27G syringe and  
759 clarified by spinning down at 16,000g for 15 min. 300-400  $\mu$ g of each lysate was adjusted to  
760 1mg/ml with TAE lysis buffer and bound to 10 $\mu$ l pre-washed GFP-trap magnetic particles in  
761 for 1-2h rotating end-over-end at 4°C. Input (5%) was taken prior to bead binding. Beads  
762 were washed thrice in modified RIPA buffer (50 mM TAE pH 7.4, 150 mM NaCl, 1% Triton  
763 X-100, 1% sodium deoxycholate, 0.1% SDS). Proteins bound to beads were conjugated to  
764 azide-biotin in 50 $\mu$ l PBS with click chemistry reactants for 1 h at RT with constant agitation.  
765 Click chemistry reactants were freshly prepared as a 5X master mix that consists of 0.5 M  
766 biotin-azide (Biotin-Picolyl azide, 1167, Click Chemistry Tools), 5 mM TCEP, 0.5 mM TBTA  
767 (Tris[(1-benzyl-1H-1,2,3-Triazol-4-yl)methyl]amine, Sigma-Aldrich) and 5 mM CuSO<sub>4</sub>.5H<sub>2</sub>O.  
768 Beads were washed thrice in modified RIPA buffer and proteins were eluted by boiling in 2X



769 SDS sample buffer before resolving with SDS-PAGE. Anti-GFP (1:4,000, Living Colors,  
770 632380, Clontech) was used to probe for GFP-CNA $\beta$ 1, biotin incorporation was detected  
771 using fluorophore conjugated Streptavidin antibody (Licor IRDye 800CW Streptavidin, LI-  
772 COR Biosciences). Amount of ABHD17A and APT2 was probed using FLAG (1:2,500;  
773 F3165, Sigma- Aldrich) antibody and APT1 was detected using for anti-RFP (1:3,000;  
774 22904, Rockland Inc.) Level of GFP-CNA $\beta$ 1 palmitoylation was quantified as streptavidin  
775 signal normalized to bound GFP signal. Statistical analyses were performed in GraphPad.  
776

### 777 **Affinity purification coupled to Mass Spectrometry (AP/MS) Analyses**

778 Stable Cell Line Generation: Human [taxid:9606] cells [Flp-In T-REx 293 cells], were  
779 transfected in a 6-well format with 0.2  $\mu$ g of tagged DNA [pcDNA5-FLAG-protein] and 2  $\mu$ g  
780 pOG44 (OpenFreezer V4134), using lipofectamine PLUS (Invitrogen), according to the  
781 manufacturer's instructions. On day 2, cells were trypsinized, and seeded into 10 cm plates.  
782 On day 3, the medium is replaced with DMEM containing 5% fetal bovine serum, 5% calf  
783 serum, 100 units/ml penicillin/streptomycin, and 200  $\mu$ g/ml hygromycin. Medium was  
784 replaced every 2- 4 days until non-transfected cells died and isolated clones were ~1-2 mm  
785 in diameter (13-15 days). Pools of cells were generated by trypsinization of the entire plate  
786 and replating in fresh selection medium (the size of the plate was dictated by the number  
787 and size of initial colonies). Pools were amplified to one 15cm plate. From this plate, cells  
788 were trypsinized (volume = 8 ml) and replated in five 15cm plates. A frozen stock was  
789 generated from the plate when cells reached ~80% confluence. Cells at ~60-70%  
790 confluence were induced with 1  $\mu$ g/ml tetracycline for 24 hours. Subconfluent cells (~85-95%  
791 confluent) were harvested as follows: medium was drained from the plate, 0.5 ml ice-cold  
792 PBS was added, and the cells were scraped (using a silicon cake spatula) and transferred to  
793 a 1.5 ml Eppendorf tube on ice. Cells were collected by centrifugation (5 min, 1500 g, 4°C),  
794 the PBS aspirated, and cells resuspended in 1 ml ice-cold PBS prior to centrifugation (5 min,  
795 1,500 g, 4°C). This step was repeated once more, the remaining PBS was aspirated, and

796 the weight of the cell pellet was determined. Cell pellets were frozen on dry ice and  
797 transferred to -80°C until processing.

798

799 *Affinity Purification:* Cells were lysed by passive lysis assisted by freeze-thaw. Briefly, to the  
800 frozen cell pellet, a 1:4 pellet weight:volume ratio of ice-cold lysis buffer was added, and the  
801 frozen pellet was resuspended by pipetting up and down. The lysis buffer was 50 mM  
802 HEPES-NaOH pH 8.0, 100 mM KCl, 2 mM EDTA, 0.1% NP40, 10% glycerol, 1 mM PMSF, 1  
803 mM DTT and Sigma protease inhibitor cocktail, P8340, 1:500. Tubes were frozen and  
804 thawed once by placing on dry ice for 5-10min, then incubated in a 37°C water bath with  
805 agitation until only a small amount of ice remained. Thawed samples were then put on ice,  
806 and the lysate transferred to 2 ml Eppendorf tubes. An aliquot (20 µl) was taken to monitor  
807 solubility. This aliquot was spun down, the supernatant transferred to a fresh tube, and 6 µl  
808 4X Laemmli sample buffer added. The pellet was resuspended in 26 µl 2X Laemmli  
809 sample buffer). The 2 ml tubes were centrifuged at 14,000 rpm for 20 min at 4°C, and the  
810 supernatant transferred to fresh 15 ml conical tubes. During centrifugation, anti-FLAG M2  
811 magnetic beads (SIGMA) were prepared: 25 µl 50% slurry was aliquoted for each IP (two  
812 150 mm plates), and the beads were washed in batch mode with 3 x 1 ml of lysis buffer. To  
813 the rest of the lysate, the equivalent of 12.5 µl packed FLAG M2 magnetic beads was added,  
814 and the mixture incubated 2 hours at 4°C with gentle agitation (nutator). Beads were pelleted  
815 by centrifugation (1,000 rpm for 1 min) and a 15 µl aliquot of the lysate post-IP was taken for  
816 analysis. Most of the supernatant was removed with a pipette, and the beads were  
817 transferred with ~200 µl of lysis buffer to a fresh 1.7ml Eppendorf tube, magnetized for ~30  
818 s, and the remaining buffer was aspirated. Two washes with 1 ml lysis buffer and two  
819 washes with 20 mM Tris-HCl (pH 8.0) 2 mM CaCl<sub>2</sub> were performed. Briefly, for each of these  
820 quick washes, the sample was demagnetized, resuspended by pipetting up and down in the  
821 wash buffer, remagnetized for ~30 s, and the supernatant aspirated (a complete wash cycle  
822 takes between 1-2 min). After the last wash, most of the liquid was removed, the tube was  
823 spun briefly (1,000 rpm for 1 min), and the remaining drops were removed with a fine pipet.

824 *Tryptic Digestion:* The beads were resuspended in 5  $\mu$ l of 20 mM Tris-HCl (pH 8.0). 500 ng  
825 of trypsin (Sigma Trypsin Singles, T7575; resuspended at 200ng/ $\mu$ l in Tris buffer) was  
826 added, and the mixture was incubated at 37°C with agitation for 4 hours. After this first  
827 incubation, the sample was magnetized and the supernatant transferred to a fresh tube.  
828 Another 500ng of trypsin was added, and the resulting sample was incubated at 37°C  
829 overnight (no agitation required). The next morning, formic acid was added to the sample to  
830 a final concentration of 2% (from a 50% stock solution).

831  
832 *Mass Spectrometry:* Half the sample was used per analysis. A spray tip was formed on  
833 fused silica capillary column (0.75  $\mu$ m ID, 350  $\mu$ m OD) using a laser puller (program = 4;  
834 heat = 280, FIL = 0, VEL = 18, DEL = 200). 10 cm ( $\pm$ 1 cm) of C18 reversed-phase material  
835 (Reprosil-Pur 120 C18-AQ, 3  $\mu$ m) was packed in the column by pressure bomb (in MeOH).  
836 The column was then pre-equilibrated in buffer A (6  $\mu$ l) before being connected in-line to a  
837 NanoLC-Ultra 2D plus HPLC system (Eksigent, Dublin, USA) coupled to an LTQ-Orbitrap  
838 Velos (Thermo Electron, Bremen, Germany) equipped with a nanoelectrospray ion source  
839 (Proxeon Biosystems, Odense, Denmark). The LTQ-Orbitrap Velos instrument under  
840 Xcalibur 2.0 was operated in the data dependent mode to automatically switch between MS  
841 and up to 10 subsequent MS/MS acquisitions. Buffer A was 100% H<sub>2</sub>O, 0.1% formic acid;  
842 buffer B was 100 ACN, 0.1% formic acid. The HPLC gradient program delivered the  
843 acetonitrile gradient over 125 min. For the first 20 minutes, the flow rate was of 400  $\mu$ l/min at  
844 2% B. The flow rate was then reduced to 200  $\mu$ l/min and the fraction of solvent B increased  
845 in a linear fashion to 35% until min 95.5. Solvent B was then increased to 80% over 5  
846 minutes and maintained at that level until 107 min. The mobile phase was then reduced to  
847 2% B until the end of the run (125 min). The parameters for data dependent acquisition on  
848 the mass spectrometer were: 1 centroid MS (mass range 400-2000) followed by MS/MS on  
849 the 10 most abundant ions. General parameters were: activation type = CID, isolation width  
850 = 1 m/z, normalized collision energy = 35, activation Q = 0.25, activation time = 10 ms. For  
851 data dependent acquisition, minimum threshold was 500, the repeat count = 1, repeat

852 duration = 30 s, exclusion size list = 500, exclusion duration = 30 s, exclusion mass width  
853 (by mass) = low 0.03, high 0.03.

854

855 Mass spectrometry data extraction: RAW mass spectrometry files were converted to mzXML  
856 using ProteoWizard (3.0.4468) and analyzed using the iProphet pipeline <sup>68</sup> implemented  
857 within ProHits <sup>69</sup> as follows. The database consisted of the human and adenovirus  
858 complements of the RefSeq protein database (version 57) supplemented with “common  
859 contaminants” from the Max Planck Institute

860 ([http://lotus1.gwdg.de/mpg/mmbc/maxquant\\_input.nsf/7994124a4298328fc125748d0048fee2/\\$FI](http://lotus1.gwdg.de/mpg/mmbc/maxquant_input.nsf/7994124a4298328fc125748d0048fee2/$FILE/contaminants.fasta)  
861 [LE/contaminants.fasta](http://lotus1.gwdg.de/mpg/mmbc/maxquant_input.nsf/7994124a4298328fc125748d0048fee2/$FILE/contaminants.fasta)) and the Global Proteome Machine (GPM;

862 <http://www.thegpm.org/crap/index.html>). The search database consisted of forward and  
863 reversed sequences (labeled “DECOY”); in total 72,226 entries were searched. The search  
864 engines used were Mascot (2.3.02; Matrix Science) and Comet <sup>70</sup> (2012.01 rev.3) with  
865 trypsin specificity (two missed cleavages were allowed) and deamidation (NQ) and oxidation  
866 (M) as variable modifications. Charges of +2, +3 and +4 were allowed, and the parent mass  
867 tolerance was set at 12 ppm while the fragment bin tolerance was set at 0.6 amu. The  
868 resulting Comet and Mascot search results were individually processed by PeptideProphet <sup>71</sup>  
869 and peptides were assembled into proteins using parsimony rules first described in  
870 ProteinProphet <sup>72</sup> into a final iProphet protein output using the Trans-Proteomic Pipeline  
871 (TPP; Linux version, v0.0 Development trunk rev 0, Build 201303061711). TPP options were  
872 as follows: general options were -p0.05 -x20 -PPM -d"DECOY", iProphet options were –  
873 ipPRIME and PeptideProphet options were –OpdP. All proteins with a minimal iProphet  
874 protein probability of 0.05 were parsed to the relational module of ProHits. Note that for  
875 analysis with SAINT, only proteins with iProphet protein probability  $\geq 0.95$  are considered.  
876 This corresponds to an estimated protein-level FDR of  $\sim 0.5\%$ . Statistical analysis was  
877 performed with SAINTexpress (with default parameters), using 38 biological replicates of  
878 FLAG-GFP (all from asynchronous HEK293 T-REx cells, all run on the Orbitrap Velos) as

879 negative controls, including two samples run in tandem with the two biological replicates.  
880 Note that the negative control experiments were previously published<sup>73,74</sup>. High-confidence  
881 interaction partners can be found in Supplementary Table 1. All mass spectrometry data was  
882 deposited to ProteomeXchange through partner MassIVE and assigned the identifiers  
883 PXD026809 and MSV000087664, respectively. The dataset can be accessed prior to  
884 publication at <ftp://MSV000087664@massive.ucsd.edu> (password: calcineurin).

885

### 886 **Immunoprecipitations**

887 For Fig. 3d, HEK 293 Flp-In T-REx cells expressing GFP vector alone, GFP-CNA $\beta$ 2, GFP-  
888 CNA $\beta$ 1 WT or C2S (C483/C493S) constructs were co-transfected with EFR3B  
889 HA\_T2A\_TTC7 MYC\_P2A\_FLAG FAM126A (WT) with GFP-PI4KA. 4 h post-transfection,  
890 the media were replaced with fresh media containing 10 ng/ml doxycycline and cells were  
891 induced for 24 h. Cells were rinsed with ice-cold PBS and harvested using a scraper.  
892 Harvested cells were pelleted by rotating at 3,500 rpm for 5 min and pellets were snap-  
893 frozen in liquid nitrogen and stored at -80°C. until use. Cell pellets were lysed in lysis buffer  
894 (50mM Tris, pH 7.5, 150 mM NaCl, 1% Triton X-100) supplemented with a protease and  
895 phosphatase inhibitor cocktail (Halt<sup>TM</sup>, ThermoFisher) and 250 U/ml benzonase for 30 min  
896 rotating end-over-end at 4°C and subjected to fine needle aspiration with sterile 27.5-gauge  
897 needle. Cell lysates were clarified by centrifugation at 16,000g for 20min and subjected to  
898 BCA assay to determine their protein concentrations. 600-800  $\mu$ g of each lysate were  
899 adjusted to 1 mg/ml with binding buffer (50 mM Tris, pH 7.5, 150 mM NaCl, 0.5% Triton X-  
900 100) and bound to 40  $\mu$ l Pierce anti-HA magnetic beads (ThermoFisher) for 4 h rotating at  
901 4°C. Beads were washed thrice in binding buffer and co-precipitated proteins were eluted by  
902 boiling in 2X SDS sample buffer for 5min. Input (2%) and bound (100%) fractions were  
903 resolved by SDS-PAGE and immunoblotted with HA (1:2,000, H3663, Sigma-Aldrich), GFP  
904 (1:4,000, Living Colors, 632380, Clontech), MYC (1:3,000, 9B11, Cell Signaling  
905 Technologies) and  $\beta$ -Actin (1:3,000; 926-42210, Li-Cor Biosciences) antibodies followed by  
906 secondary Li-Cor antibodies. Blots were imaged with the Li-Cor Odyssey imaging system.

907 Binding of GFP-proteins was quantified as GFP signal/MYC bound signal normalized to the  
908 GFP signal/Actin Input signal. Statistical significance was determined using GraphPad. For  
909 Fig. 6a, HeLa cells co-transfected with EFR3B HA\_T2A\_TTC7 MYC\_P2A\_FLAG FAM126A  
910 (WT or ASASAA) and GFP-PI4KA constructs. 48h post transfection, cells were harvested,  
911 processed, and bound to anti-HA beads as described above. For Supplementary Fig. 3b,  
912 HEK293 Flp-In T-REx expressing GFP vector alone, GFP-CNA $\alpha$ , GFP-CNA $\beta$ 2, GFP-CNA $\beta$ 1  
913 WT or C2S were transfected with FLAG-NFATC1. Cells were induced, harvested, and lysed  
914 as described above. 1000  $\mu$ g of each lysate was bound to 15  $\mu$ l pre-washed GFP-Trap  
915 magnetic beads (Bulldog Bio. Inc.) in 1 ml binding buffer for 2h, rotating end-over-end at  
916 4°C. Beads were washed thrice in binding buffer and eluted by boiling in 2x SDS sample  
917 buffer for 5 min. Inputs (2%) and eluates were resolved by SDS-PAGE followed by western  
918 blotting. Binding was quantified as described above.

919

#### 920 **Proximity-dependent biotin identification (BioID) analysis:**

921 HeLa cells were seeded onto 10cm plates and transfected at 80% confluence with MYC-  
922 BirA-CNA $\beta$ 1. 24 hours post transfection, cells were passaged onto two 10 cm plates and let  
923 to grow overnight. The next day, cells were co-transfected with EFR3B HA\_T2A\_TTC7B  
924 GFP\_P2A\_FLAG FAM126A (WT or ASASAA mutant) and HA-PI4KA. Four hours post-  
925 transfection, the media were replaced with fresh media containing 50  $\mu$ M D-biotin (Sigma B-  
926 4501). After 16 hours of labeling, cells were collected and snap frozen in liquid nitrogen.  
927 Cells were lysed in RIPA buffer (150 mM NaCl, 1% Triton X-100, 0.5% Deoxycholate, 0.1%  
928 SDS, 50 mM Tris pH 8.0) supplemented with a protease and phosphatase inhibitor cocktail  
929 (Halt<sup>TM</sup>, ThermoFisher) and 250 U/ml benzonase (EMD Millipore) for 30 min rotating end-  
930 over-end at 4°C and subjected to fine needle aspiration with a sterile 27.5-gauge needle.  
931 Cell lysates were clarified by centrifugation (16,000g for 20 min). Solubilized protein  
932 concentration in the supernatant were quantified using BCA analysis. For each binding  
933 reaction, 1 mg of clarified lysate was incubated with 30  $\mu$ l of pre-rinsed streptavidin magnetic



934 particles (11641786001, Sigma-Aldrich) in 1 ml RIPA buffer for 16h, rotating at 4°C. An input  
935 aliquot (20 µl) was removed prior to bead addition. Beads were washed three times with 1ml  
936 RIPA buffer, rotating for 5 min each, and eluted in 2X sample buffer (10%SDS, 0.06%  
937 Bromophenol blue, 50% glycerol, 0.6 M DTT, 375 mM Tris-HCl pH 6.8). Inputs and bound  
938 (100%) samples were boiled and resolved by SDS-PAGE followed by western blotting with  
939 mouse FLAG (1:2,500; F3165, Sigma- Aldrich), rabbit MYC (1:2,000; 71D10, Cell Signaling),  
940 mouse HA (1:2,000, H3663, Sigma-Aldrich), mouse GFP (1:4,000, Living Colors, 632380,  
941 Clontech) and rabbit β-Actin (1:3,000; 926-42210, Li-Cor Biosciences) antibodies. Blots were  
942 imaged with Li-Cor Odyssey imaging system following incubation with secondary Li-Cor  
943 antibodies. Binding for each protein was quantified as their respective signals/MYC bound  
944 signal normalized to respective signals/Actin Input signal. Biotinylation of each protein in  
945 complex with WT FAM126A, is set to 1. Statistical significance was determined using  
946 GraphPad.

947

#### 948 **In vitro peptide binding assays**

949 Purification of Calcineurin: 6xHis-tagged human calcineurin A (α isoform, truncated at  
950 residue 392), WT or <sup>330</sup>NIR<sup>332</sup>-AAA mutant were expressed in tandem with the calcineurin B  
951 subunit in *E. coli* BL21 (DE3) cells (Invitrogen, USA) and cultured in LB medium containing  
952 carbenicillin (50 µg/ml) at 37°C to mid-log phase. Expression was induced with 1 mM IPTG  
953 at 16°C for 18 h. Cells were pelleted, washed and frozen at -80°C for at least 12 h. Thawed  
954 cell pellets were re-suspended in lysis buffer (50 mM Tris-HCl pH 7.5, 150 mM NaCl, 0.1%  
955 Tween 20, 1mM β-mercaptoethanol, protease inhibitors) and lysed by sonication using four,  
956 1-minute pulses at 40% output. Extracts were clarified using two rounds of centrifugation  
957 (20,000 X g, 20 min) and then bound to 1 ml of Ni-NTA agarose beads (Invitrogen) in lysis  
958 buffer containing 5mM imidazole for 2-4 hr. at 4°C, in batch. Bound beads were loaded onto  
959 a column and washed with lysis buffer containing 20 mM imidazole and eluted with lysis  
960 buffer containing 300 mM imidazole, pH 7.5. Purified calcineurin heterodimer were dialyzed

961 in buffer (50 mM Tris-HCl pH 7.5, 150 mM NaCl, 1 mM  $\beta$ -mercaptoethanol) and stored in  
962 10% glycerol at  $-80^{\circ}\text{C}$ .

963

964 Peptide purification: 16mer peptides were fused to GST in vector pGEX-4T-3 and expressed  
965 in *E. coli* BL21 (DE3) (Invitrogen). Cells were grown at  $37^{\circ}\text{C}$  to mid-log phase and induced  
966 with 1 mM IPTG for 2 hr. Cell lysates were prepared using the EasyLyse™ bacterial protein  
967 extract solution (Lucigen Corp. USA) or the CellLytic B reagent (Sigma, USA) according to  
968 the manufacturers' protocol and were stored at  $-80^{\circ}\text{C}$ .

969

970 In vitro binding : 1-2  $\mu\text{g}$  His-tagged calcineurin was first bound to magnetic Dynabeads  
971 (Thermo Fisher Sci. USA) in base buffer (50 mM Tris-HCl pH 7.5, 150 mM NaCl, 0.1%  
972 Tween 20, 1 mM  $\beta$ -mercaptoethanol, protease inhibitors, 5-10 mM imidazole, 1 mg/ml BSA)  
973 for 1 h at  $4^{\circ}\text{C}$ . 50-100  $\mu\text{g}$  of bacterial cell lysate containing GST-peptide was then added to  
974 the binding reaction and incubated further for 2-3 hr. 3% of the reaction mix was removed as  
975 'input' prior to the incubation, boiled in 2X-SDS sample buffer and stored at  $-20^{\circ}\text{C}$ . The  
976 beads were washed in base buffer containing 15-20 mM imidazole. Bound proteins were  
977 then extracted with 2X-SDS sample buffer by boiling for 5 min. The proteins were analyzed  
978 by SDS-PAGE and immunoblotting with anti-GST (BioLegend MMS-112P) and anti-His  
979 (Qiagen 34660) antibodies. Blots were imaged with the Li-Cor Odyssey imaging system.  
980 GST peptides co-purifying with HIS-CN were normalized to their respective input and  
981 amount of calcineurin pulled down. Co-purification with CN was reported relative to that of  
982 the peptide with the known PxIxIT motif from NFATC1: PALESPRIEITSCLGL. Statistical  
983 significance was determined with unpaired Student's T test, using GraphPad. For Fig. S4B,  
984 FAM126A peptides used were FAM126A PSISIT: SGQQRPPSISITLSTD and FAM126A  
985 ASASAA Mut: SGQQRPASASAALSTD.

986

987 **Hydrogen-Deuterium Exchange analysis (HDX-MS)**



988 Protein expression: GST-tagged human calcineurin A (residues 2-391 of human CNA alpha  
989 isoform) in tandem with calcineurin B subunit were expressed in BL21 C41 *Escherichia coli*,  
990 induced with 0.1 mM IPTG (isopropyl  $\beta$ -d-1-thiogalactopyranoside) and grown at 23 °C  
991 overnight. Cells were harvested, flash frozen in liquid nitrogen, and stored at -80°C until  
992 use. Bacmids harboring MultiBac PI4KA complex constructs were transfected into  
993 *Spodoptera frugiperda* (Sf9) cells, and viral stocks amplified for one generation to acquire a  
994 P2 generation final viral stock. Final viral stocks were added to Sf9 cells at  $\sim 1.8 \times 10^6$  in a  
995 1/100 to 1/50 virus volume to cell volume ratio. Constructs were expressed for 68 hrs before  
996 pelleting of infected cells. Cell pellets were snap frozen in liquid nitrogen, followed by  
997 storage at - 80 °C.

998 Protein purification (GST tagged human calcineurin): *Escherichia coli* cell pellets were lysed  
999 by sonication for 5 min in lysis buffer [50 mM Tris pH 8.0, 100 mM NaCl, 2 mM EDTA, 2 mM  
1000 EGTA, protease inhibitors (Millipore Protease Inhibitor Cocktail Set III, Animal-Free)]. NaCl  
1001 solution was added to 1 M and the solution was centrifuged for 10 min at 12,000  $\times g$  at 1°C  
1002 and for 20 min at 38,000  $\times g$  at 1°C (Beckman Coulter Avanti J-25I, JA 25.50 rotor). CHAPS  
1003 was added to 0.02%. Supernatant was loaded onto a 5 ml GSTrap 4B column (GE) in a  
1004 superloop for 45 min and the column was washed in Wash Buffer [50 mM Tris pH 8.0,  
1005 110 mM KOAc, 2 mM MgOAc, 1 mM DTT, 5% glycerol (v/v), 0.02% chaps] to remove  
1006 nonspecifically bound proteins. The column was washed in Wash Buffer containing 2 mM  
1007 ATP to remove the GroEL chaperone. The GST-tag was cleaved by adding Wash Buffer  
1008 containing PreScission protease to the column and incubating overnight at 4 °C. Cleaved  
1009 protein was eluted with Wash Buffer. Protein was concentrated using an Amicon 10 kDa  
1010 MWCO concentrator (MilliporeSigma) and size exclusion chromatography (SEC) was  
1011 performed using a Superdex 75 10/300 column equilibrated in Wash Buffer. Fractions  
1012 containing protein of interest were pooled, concentrated, flash frozen and stored at - 80 °C.

1013 Protein purification (PI4KA complex): Sf9 pellets were resuspended in lysis buffer [20 mM  
1014 imidazole pH 8.0, 100 mM NaCl, 5% glycerol, 2 mM  $\beta$ Me, protease (Protease Inhibitor  
1015 Cocktail Set III, Sigma)] and lysed by sonication. Triton X-100 was added to 0.1% final, and  
1016 lysate was centrifuged for 45 min at 20,000 x g at 1°C. (Beckman Coulter Avanti J-25I, JA  
1017 25.50 rotor). Supernatant was loaded onto a HisTrap FF Crude column (GE Healthcare) and  
1018 superlooped for 1 h. The column was washed with Ni-NTA A buffer [20 mM imidazole pH  
1019 8.0, 100 mM NaCl, 5% glycerol (v/v), 2 mM  $\beta$ Me], washed with 6% Ni-NTA B buffer [30 mM  
1020 imidazole pH 8.0, 100 mM NaCl, 5% (v/v) glycerol, 2 mM  $\beta$ Me], and the protein eluted with  
1021 100% Ni-NTA B buffer (450 mM imidazole). Elution fractions were passed through a 5 ml  
1022 StrepTrapHP column pre-equilibrated in GF buffer [20 mM imidazole pH 7.0, 150 mM NaCl,  
1023 5% glycerol (v/v), 0.5 mM TCEP]. The column was washed with GF buffer before loading a  
1024 tobacco etch virus protease containing a stabilizing lipoyl domain (Lip-TEV), and cleavage  
1025 proceeded overnight. Cleaved protein was eluted with GF buffer and concentrated down to  
1026 250  $\mu$ l in an Amicon 50 kDa MWCO concentrator (MilliporeSigma) pre-equilibrated in GF  
1027 buffer. Concentrated protein was flash frozen in liquid nitrogen and stored at -80°C.

### 1028 ***Hydrogen-Deuterium Exchange Mass Spectrometry***

1029 Sample preparation: HDX reactions for PI4KA complex (PI4KIII $\alpha$ , TTC7B, FAM126A) and  
1030 Calcineurin were conducted in a final reaction volume of 24  $\mu$ l with a final concentration of  
1031 0.17  $\mu$ M (8 pmol) PI4KA complex and 0.95  $\mu$ M (24 pmol) Calcineurin. The reaction was  
1032 initiated by the addition of 16  $\mu$ l of D<sub>2</sub>O buffer (150 mM NaCl, 20 mM pH 8.0 Imidazole, 90%  
1033 D<sub>2</sub>O (V/V)) to 6.5  $\mu$ l of PI4KA or PI4K buffer solution and 0.66  $\mu$ l Calcineurin or Calcineurin  
1034 buffer solution (final D<sub>2</sub>O concentration of 65%). The reaction proceeded for 3, 30, 300, or  
1035 3000 s at 20°C, before being quenched with ice cold acidic quench buffer, resulting in a final  
1036 concentration of 0.6M guanidine-HCl and 0.9% formic acid post quench. All conditions and  
1037 timepoints were generated in triplicate. Samples were flash frozen immediately after  
1038 quenching and stored at -80°C until injected onto the ultra-performance liquid

1039 chromatography (UPLC) system for proteolytic cleavage, peptide separation, and injection  
1040 onto a QTOF for mass analysis, described below.

1041

1042 Protein digestion and MS/MS data collection: Protein samples were rapidly thawed and  
1043 injected onto an integrated fluidics system containing a HDx-3 PAL liquid handling robot and  
1044 climate-controlled (2°C) chromatography system (LEAP Technologies), a Dionex Ultimate  
1045 3000 UHPLC system, as well as an Impact HD QTOF Mass spectrometer (Bruker). The full  
1046 details of the automated LC system are described in <sup>75</sup>. The protein was run over one  
1047 immobilized pepsin column (Trajan; ProDx protease column, 2.1 mm x 30 mm PDX.PP01-  
1048 F32) at 200 µL/min for 3 minutes at 10°C. The resulting peptides were collected and  
1049 desalted on a C18 trap column (Acquity UPLC BEH C18 1.7mm column (2.1 x 5 mm);  
1050 Waters 186003975). The trap was subsequently eluted in line with an ACQUITY 1.7 µm  
1051 particle, 100 × 1 mm<sup>2</sup> C18 UPLC column (Waters), using a gradient of 3-35% B (Buffer A  
1052 0.1% formic acid; Buffer B 100% acetonitrile) over 11 minutes immediately followed by a  
1053 gradient of 35-80% over 5 minutes. Mass spectrometry experiments acquired over a mass  
1054 range from 150 to 2200 m/z using an electrospray ionization source operated at a  
1055 temperature of 200C and a spray voltage of 4.5 kV.

1056

1057 Peptide identification: Peptides were identified from the non-deuterated samples of PI4K  
1058 using data-dependent acquisition following tandem MS/MS experiments (0.5 s precursor  
1059 scan from 150-2000 m/z; twelve 0.25 s fragment scans from 150-2000 m/z). MS/MS  
1060 datasets were analyzed using PEAKS7 (PEAKS), and peptide identification was carried out  
1061 by using a false discovery-based approach, with a threshold set to 1% using a database of  
1062 known contaminants found in Sf9 cells and BL21 C41 *Escherichia coli* <sup>76</sup>. The search  
1063 parameters were set with a precursor tolerance of 20 ppm, fragment mass error 0.02 Da,  
1064 charge states from 1-8, leading to a selection criterion of peptides that had a -10logP score  
1065 of 35.4 and 29.3 for the PI4KA complex and calcineurin, respectively.

1066

1067 Mass Analysis of Peptide Centroids and Measurement of Deuterium Incorporation:  
1068 HD-Examiner Software (Sierra Analytics) was used to calculate the level of deuterium  
1069 incorporation into each peptide. All peptides were manually inspected for correct charge  
1070 state, correct retention time, and appropriate selection of isotopic distribution. Deuteration  
1071 levels were calculated using the centroid of the experimental isotope clusters. Results are  
1072 presented as relative levels of deuterium incorporation, with no correction for back  
1073 exchange. The only correction was for the deuterium percentage of the buffer in the  
1074 exchange reaction (65%). Differences in exchange in a peptide were considered significant if  
1075 they met all three of the following criteria:  $\geq 5\%$  change in exchange,  $\geq 0.5$  Da difference in  
1076 exchange, and a two-tailed T-test value of less than 0.01. The raw HDX data are shown in  
1077 two different formats. The raw peptide deuterium incorporation graphs for a selection of  
1078 peptides with significant differences are shown in Fig. 4e+g, with the raw data for all  
1079 analyzed peptides in the source data (Supplementary Table 3). To allow for visualization of  
1080 differences across all peptides, we utilized number of deuterium difference (#D) plots (Fig.  
1081 4d). These plots show the total difference in deuterium incorporation over the entire H/D  
1082 exchange time course, with each point indicating a single peptide. Samples were only  
1083 compared within a single experiment and were never compared to experiments completed at  
1084 a different time with a different final D<sub>2</sub>O level. The data analysis statistics for all HDX-MS  
1085 experiments are in Supplementary Table 2 according to published guidelines<sup>77</sup>. The mass  
1086 spectrometry proteomics data have been deposited to the ProteomeXchange Consortium  
1087 via the PRIDE partner repository<sup>78</sup> with the dataset identifier PXD025900.

1088

### 1089 ***In vivo* analysis of FAM126A phosphorylation status**

1090 HeLa cells seeded onto 10 cm plates were transfected with EFR3B HA\_T2A\_TTC7B  
1091 MYC\_P2A\_FLAG FAM126A WT or ASASAA mutant. 24 h post-transfection, plates were  
1092 washed, trypsinized and passaged onto 60 mm plates for treatments. The next day, cells  
1093 were pre-treated with 2  $\mu$ M FK506 (LC Laboratories) for 1 h, 2  $\mu$ M BIM (bisindolylmaleimide,

1094 Calbiochem) for 15 min or DMSO in growth media. Cells were then stimulated with 500 nM  
1095 PMA (Phorbol 12-myristate 13-acetate, Sigma-Aldrich) or DMSO for 15 min, washed and  
1096 harvested in ice-cold PBS. Pellets were snap-frozen in liquid nitrogen and stored at -80°C  
1097 until use. Cells were lysed with RIPA buffer (150 mM NaCl, 1% Triton X-100, 0.5%  
1098 Deoxycholate, 0.1% SDS, 50 mM Tris pH 8.0) supplemented with protease and  
1099 phosphatase inhibitor cocktail and 250U/ml benzonase for 30 min rotating end-over-end at  
1100 4°C and subjected to fine needle aspiration with sterile 27.5-gauge needle. Cell lysates were  
1101 clarified by centrifugation (16,000g for 20min). Solubilized protein concentration in the  
1102 supernatant were quantified using BCA analysis. 20 µg from each lysate was run out on  
1103 7.5% SDS-PAGE gels followed by analysis with Western blot. Changes in electrophoretic  
1104 mobility of FAM126A were assessed by immunoblotting with anti-FLAG and custom anti-  
1105 phosphospecific FAM126A S485 antibody. PKC activation was assessed by phosphorylation  
1106 of the downstream substrate, ERK using p44/42 Erk1/2 antibody (1:3,000; 3A7, Cell  
1107 Signaling Technologies). Phosphorylation status of FAM126A in each treatment was  
1108 quantified as pFAM126A S485 signal/FLAG signal and reported relative to that of in DMSO  
1109 treated FAM126A WT sample, using ImageStudio imaging software. Statistical significance  
1110 was determined using GraphPad.

1111

### 1112 **Bioluminescence resonance energy transfer (BRET) measurements**

1113 HEK 293T cells were trypsinized and plated on white 96-well plates at a density of 75,000  
1114 cells/100 µl per well, together with the indicated DNA constructs (0.15 µg total DNA in 25 µl  
1115 per well) and the cell transfection reagent (1.5 µl GeneCellin (Bulldog Bio) in 25 µl per well)  
1116 in Opti-MEM reduced serum medium (Gibco). Cells were transfected with DNA encoding the  
1117 human M3 muscarinic receptor (0.1 µg total DNA/well) and the previously established SidM-  
1118 2XP4M-based PI4P biosensor<sup>28</sup> (0.05 µg total DNA/well). After 6 h, media were replaced  
1119 with 100 µl/well Dulbecco's modified Eagle's medium (DMEM) supplemented with 10% fetal  
1120 bovine serum, 50 U/ml penicillin and 50 µg/ml streptomycin. Measurements were performed

1121 28 h post-transfection. Prior to measurements, media of cells were replaced with 50  $\mu$ l buffer  
1122 containing 120 mM NaCl, 4.7 mM KCl, 1.2 mM CaCl<sub>2</sub>, 0.7 mM MgSO<sub>4</sub>, 10 mM glucose and  
1123 10 mM Na-HEPES, pH 7.4. Cells were pretreated with FK506 (1  $\mu$ M), Cyclosporin A (10  $\mu$ M)  
1124 or DMSO for 1 h at 37°C. Measurements were performed at 37°C using a Varioskan Flash  
1125 Reader (Thermo Scientific) and initiated with the addition of the cell permeable luciferase  
1126 substrate, coelenterazine h (20  $\mu$ l, final concentration of 5  $\mu$ M). Counts were recorded using  
1127 485 and 530 nm emission filters. Detection time was 250 ms for each wavelength. The  
1128 indicated reagents were also dissolved in modified Krebs-Ringer buffer and were added  
1129 manually in 10  $\mu$ l. For this, plates were unloaded, which resulted in an interruption in the  
1130 recordings. All measurements were done at least in triplicates. BRET ratios were calculated  
1131 by dividing the 530 nm and 485 nm intensities and results were normalized to the baseline.  
1132 Since the absolute initial ratio values depended on the expression of the sensor, the resting  
1133 levels were considered as 100%, whereas the 0% was determined from values of those  
1134 experiments where cytoplasmic Renilla luciferase construct was expressed alone.

1135

### 1136 **Statistical Analysis**

1137 Statistics were computed using Graphpad Prism 9. All data shown as representative images  
1138 or as the mean of measurements with standard deviation (SD) error bars unless noted  
1139 otherwise. Data represent at least three independent experiments. For image analysis in Fig.  
1140 1f and Supplementary Fig.1f, number of cells analyzed for GM130 co-localization were as  
1141 follows: n=166 for CNA $\beta$ 2, n=164 for CNA $\beta$ 1, n=130 for CNA $\beta$ 1<sup>C483</sup>, n=128 for CNA $\beta$ 1<sup>C493S</sup>,  
1142 n=119 for CNA $\beta$ 1<sup>C2S</sup>. For plasma membrane signal ratio measurements: n=75 for CNA $\beta$ 2,  
1143 n=86 for CNA $\beta$ 1, n=98 for CNA $\beta$ 1<sup>C483</sup>, n=80 for CNA $\beta$ 1<sup>C493S</sup>, n=77 for CNA $\beta$ 1<sup>C2S</sup>. Image  
1144 analysis for Fig. 2g were performed on n=76 for vector control, n=94 for wildtype ABHD17A,  
1145 n=89 for ABHD17A S190A mutant. Fig. 1g immunoblot is representative of n=5 for EFR3B-  
1146 FLAG, n=5 for FLAG-CNA $\beta$ 1, n=3 for each CNA $\beta$ 1 mutant (C483S, C493S, C2S). Two-  
1147 tailed unpaired Student's *t*-test was applied for statistical analyses between two groups.

1148 One-way analysis of variance (ANOVA) with appropriate multiple comparisons (all indicated  
1149 in figure legends) were performed when comparing more than two groups.

1150

### 1151 **Data Availability**

1152 All AP-MS data have been deposited to ProteomeXchange through partner MassIVE with  
1153 the following identifiers: PXD026809 and MSV000087664, respectively. The dataset can be  
1154 accessed at <ftp://MSV000087664@massive.ucsd.edu> (password: calcineurin). HDX-MS  
1155 proteomics data have been deposited to the ProteomeXchange via the PRIDE partner  
1156 repository with the dataset identifier PXD025900. The source data for Figs. 1c-d,f-g; 2b-f;  
1157 3d-e; 4b-c; 5a-b; 6a-b,d and Supplementary Figs 1b-c,f; 2a-b; 3b-c; 4b-c are provided as a  
1158 Source Data file. All other primary data that support the findings of this study are available  
1159 from the corresponding author upon reasonable request.

1160

1161

1162

1163

1164

1165

1166

1167

1168

1169

1170

1171

1172

1173

1174

1175



1176 **References**

1177

1178 1 Rusnak, F. & Mertz, P. Calcineurin: form and function. *Physiol Rev* **80**, 1483-1521,  
1179 doi:10.1152/physrev.2000.80.4.1483 (2000).

1180 2 Mansuy, I. M. Calcineurin in memory and bidirectional plasticity. *Biochem Biophys*  
1181 *Res Commun* **311**, 1195-1208, doi:10.1016/j.bbrc.2003.10.046 (2003).

1182 3 Schulz, R. A. & Yutzey, K. E. Calcineurin signaling and NFAT activation in  
1183 cardiovascular and skeletal muscle development. *Dev Biol* **266**, 1-16,  
1184 doi:10.1016/j.ydbio.2003.10.008 (2004).

1185 4 Jain, J. *et al.* The T-cell transcription factor NFATp is a substrate for calcineurin and  
1186 interacts with Fos and Jun. *Nature* **365**, 352-355, doi:10.1038/365352a0 (1993).

1187 5 Liu, J. *et al.* Calcineurin is a common target of cyclophilin-cyclosporin A and FKBP-  
1188 FK506 complexes. *Cell* **66**, 807-815, doi:10.1016/0092-8674(91)90124-h (1991).

1189 6 Wigington, C. P. *et al.* Systematic Discovery of Short Linear Motifs Decodes  
1190 Calcineurin Phosphatase Signaling. *Mol Cell* **79**, 342-358 e312,  
1191 doi:10.1016/j.molcel.2020.06.029 (2020).

1192 7 Brauer, B. L. *et al.* Leveraging New Definitions of the LxVP SLiM To Discover Novel  
1193 Calcineurin Regulators and Substrates. *ACS Chem Biol* **14**, 2672-2682,  
1194 doi:10.1021/acscchembio.9b00606 (2019).

1195 8 Hashimoto, Y., Perrino, B. A. & Soderling, T. R. Identification of an autoinhibitory  
1196 domain in calcineurin. *J Biol Chem* **265**, 1924-1927 (1990).

1197 9 Perrino, B. A., Ng, L. Y. & Soderling, T. R. Calcium regulation of calcineurin  
1198 phosphatase activity by its B subunit and calmodulin. Role of the autoinhibitory  
1199 domain. *J Biol Chem* **270**, 340-346, doi:10.1074/jbc.270.1.340 (1995).

- 1200 10 Yang, S. A. & Klee, C. B. Low affinity Ca<sup>2+</sup>-binding sites of calcineurin B mediate  
1201 conformational changes in calcineurin A. *Biochemistry* **39**, 16147-16154,  
1202 doi:10.1021/bi001321q (2000).
- 1203 11 Stemmer, P. M. & Klee, C. B. Dual calcium ion regulation of calcineurin by calmodulin  
1204 and calcineurin B. *Biochemistry* **33**, 6859-6866, doi:10.1021/bi00188a015 (1994).
- 1205 12 Li, S. J. *et al.* Cooperative autoinhibition and multi-level activation mechanisms of  
1206 calcineurin. *Cell Res* **26**, 336-349, doi:10.1038/cr.2016.14 (2016).
- 1207 13 Guerini, D. & Klee, C. B. Cloning of human calcineurin A: evidence for two isozymes  
1208 and identification of a polyproline structural domain. *Proc Natl Acad Sci U S A* **86**,  
1209 9183-9187, doi:10.1073/pnas.86.23.9183 (1989).
- 1210 14 Lara-Pezzi, E. *et al.* A naturally occurring calcineurin variant inhibits FoxO activity and  
1211 enhances skeletal muscle regeneration. *J Cell Biol* **179**, 1205-1218,  
1212 doi:10.1083/jcb.200704179 (2007).
- 1213 15 Bond, R., Ly, N. & Cyert, M. S. The unique C terminus of the calcineurin isoform  
1214 CNA $\beta$ 1 confers non-canonical regulation of enzyme activity by Ca(2+) and  
1215 calmodulin. *J Biol Chem* **292**, 16709-16721, doi:10.1074/jbc.M117.795146 (2017).
- 1216 16 Roy, J. & Cyert, M. S. Cracking the phosphatase code: docking interactions determine  
1217 substrate specificity. *Sci Signal* **2**, re9, doi:10.1126/scisignal.2100re9 (2009).
- 1218 17 Rodriguez, A. *et al.* A conserved docking surface on calcineurin mediates interaction  
1219 with substrates and immunosuppressants. *Mol Cell* **33**, 616-626,  
1220 doi:10.1016/j.molcel.2009.01.030 (2009).
- 1221 18 Goldman, A. *et al.* The calcineurin signaling network evolves via conserved kinase-  
1222 phosphatase modules that transcend substrate identity. *Mol Cell* **55**, 422-435,  
1223 doi:10.1016/j.molcel.2014.05.012 (2014).

- 1224 19 Davey, N. E., Cyert, M. S. & Moses, A. M. Short linear motifs - ex nihilo evolution of  
1225 protein regulation. *Cell Commun Signal* **13**, 43, doi:10.1186/s12964-015-0120-z  
1226 (2015).
- 1227 20 Li, H., Zhang, L., Rao, A., Harrison, S. C. & Hogan, P. G. Structure of calcineurin in  
1228 complex with PVIVIT peptide: portrait of a low-affinity signalling interaction. *J Mol*  
1229 *Biol* **369**, 1296-1306, doi:10.1016/j.jmb.2007.04.032 (2007).
- 1230 21 Grigoriu, S. *et al.* The molecular mechanism of substrate engagement and  
1231 immunosuppressant inhibition of calcineurin. *PLoS Biol* **11**, e1001492,  
1232 doi:10.1371/journal.pbio.1001492 (2013).
- 1233 22 Felkin, L. E. *et al.* Calcineurin splicing variant calcineurin Abeta1 improves cardiac  
1234 function after myocardial infarction without inducing hypertrophy. *Circulation* **123**,  
1235 2838-2847, doi:10.1161/CIRCULATIONAHA.110.012211 (2011).
- 1236 23 Lopez-Olaneta, M. M. *et al.* Induction of the calcineurin variant CnAbeta1 after  
1237 myocardial infarction reduces post-infarction ventricular remodelling by promoting  
1238 infarct vascularization. *Cardiovasc Res* **102**, 396-406, doi:10.1093/cvr/cvu068 (2014).
- 1239 24 Padron-Barthe, L. *et al.* Activation of Serine One-Carbon Metabolism by Calcineurin  
1240 Abeta1 Reduces Myocardial Hypertrophy and Improves Ventricular Function. *J Am*  
1241 *Coll Cardiol* **71**, 654-667, doi:10.1016/j.jacc.2017.11.067 (2018).
- 1242 25 Gomez-Salinerio, J. M. *et al.* The Calcineurin Variant CnAbeta1 Controls Mouse  
1243 Embryonic Stem Cell Differentiation by Directing mTORC2 Membrane Localization  
1244 and Activation. *Cell Chem Biol* **23**, 1372-1382, doi:10.1016/j.chembiol.2016.09.010  
1245 (2016).
- 1246 26 Berridge, M. J. Inositol trisphosphate and diacylglycerol as second messengers.  
1247 *Biochem J* **220**, 345-360, doi:10.1042/bj2200345 (1984).

- 1248 27 Balla, A. *et al.* Maintenance of hormone-sensitive phosphoinositide pools in the  
1249 plasma membrane requires phosphatidylinositol 4-kinase III $\alpha$ . *Mol Biol Cell* **19**,  
1250 711-721, doi:10.1091/mbc.e07-07-0713 (2008).
- 1251 28 Toth, J. T. *et al.* BRET-monitoring of the dynamic changes of inositol lipid pools in  
1252 living cells reveals a PKC-dependent PtdIns4P increase upon EGF and M3 receptor  
1253 activation. *Biochim Biophys Acta* **1861**, 177-187, doi:10.1016/j.bbaliip.2015.12.005  
1254 (2016).
- 1255 29 Nakatsu, F. *et al.* PtdIns4P synthesis by PI4KIII $\alpha$  at the plasma membrane and its  
1256 impact on plasma membrane identity. *J Cell Biol* **199**, 1003-1016,  
1257 doi:10.1083/jcb.201206095 (2012).
- 1258 30 Baskin, J. M. *et al.* The leukodystrophy protein FAM126A (hyccin) regulates  
1259 PtdIns(4)P synthesis at the plasma membrane. *Nat Cell Biol* **18**, 132-138,  
1260 doi:10.1038/ncb3271 (2016).
- 1261 31 Baird, D., Stefan, C., Audhya, A., Weys, S. & Emr, S. D. Assembly of the PtdIns 4-  
1262 kinase Stt4 complex at the plasma membrane requires Ypp1 and Efr3. *J Cell Biol* **183**,  
1263 1061-1074, doi:10.1083/jcb.200804003 (2008).
- 1264 32 Wu, X. *et al.* Structural insights into assembly and regulation of the plasma  
1265 membrane phosphatidylinositol 4-kinase complex. *Dev Cell* **28**, 19-29,  
1266 doi:10.1016/j.devcel.2013.11.012 (2014).
- 1267 33 Bojjireddy, N., Guzman-Hernandez, M. L., Reinhard, N. R., Jovic, M. & Balla, T. EFR3s  
1268 are palmitoylated plasma membrane proteins that control responsiveness to G-  
1269 protein-coupled receptors. *J Cell Sci* **128**, 118-128, doi:10.1242/jcs.157495 (2015).
- 1270 34 Lees, J. A. *et al.* Architecture of the human PI4KIII $\alpha$  lipid kinase complex. *Proc*  
1271 *Natl Acad Sci U S A* **114**, 13720-13725, doi:10.1073/pnas.1718471115 (2017).

- 1272 35 Dornan, G. L. *et al.* Probing the Architecture, Dynamics, and Inhibition of the  
1273 PI4KIIIalpha/TTC7/FAM126 Complex. *J Mol Biol* **430**, 3129-3142,  
1274 doi:10.1016/j.jmb.2018.07.020 (2018).
- 1275 36 Lan, T. H., Liu, Q., Li, C., Wu, G. & Lambert, N. A. Sensitive and high resolution  
1276 localization and tracking of membrane proteins in live cells with BRET. *Traffic* **13**,  
1277 1450-1456, doi:10.1111/j.1600-0854.2012.01401.x (2012).
- 1278 37 Blanc, M. *et al.* SwissPalm: Protein Palmitoylation database. *F1000Res* **4**, 261,  
1279 doi:10.12688/f1000research.6464.1 (2015).
- 1280 38 Gomez-Salinerio, J. M., Pavia, P. G. & Lara-Pezzi, E. CnAbeta1 shifts cardiac  
1281 metabolism. *Aging (Albany NY)* **11**, 839-840, doi:10.18632/aging.101789 (2019).
- 1282 39 Forrester, M. T. *et al.* Site-specific analysis of protein S-acylation by resin-assisted  
1283 capture. *J Lipid Res* **52**, 393-398, doi:10.1194/jlr.D011106 (2011).
- 1284 40 Percher, A. *et al.* Mass-tag labeling reveals site-specific and endogenous levels of  
1285 protein S-fatty acylation. *Proc Natl Acad Sci U S A* **113**, 4302-4307,  
1286 doi:10.1073/pnas.1602244113 (2016).
- 1287 41 Lakkaraju, A. K. *et al.* Palmitoylated calnexin is a key component of the ribosome-  
1288 translocon complex. *EMBO J* **31**, 1823-1835, doi:10.1038/emboj.2012.15 (2012).
- 1289 42 Dallavilla, T. *et al.* Model-Driven Understanding of Palmitoylation Dynamics:  
1290 Regulated Acylation of the Endoplasmic Reticulum Chaperone Calnexin. *PLoS*  
1291 *Comput Biol* **12**, e1004774, doi:10.1371/journal.pcbi.1004774 (2016).
- 1292 43 Conibear, E. & Davis, N. G. Palmitoylation and depalmitoylation dynamics at a  
1293 glance. *J Cell Sci* **123**, 4007-4010, doi:10.1242/jcs.059287 (2010).

- 1294 44 Lin, D. T. & Conibear, E. ABHD17 proteins are novel protein depalmitoylases that  
1295 regulate N-Ras palmitate turnover and subcellular localization. *Elife* **4**, e11306,  
1296 doi:10.7554/eLife.11306 (2015).
- 1297 45 Martin, B. R. & Cravatt, B. F. Large-scale profiling of protein palmitoylation in  
1298 mammalian cells. *Nat Methods* **6**, 135-138, doi:10.1038/nmeth.1293 (2009).
- 1299 46 Sheftic, S. R., Page, R. & Peti, W. Investigating the human Calcineurin Interaction  
1300 Network using the piLxVP SLiM. *Sci Rep* **6**, 38920, doi:10.1038/srep38920 (2016).
- 1301 47 Hauser, H. P., Bardroff, M., Pyrowolakis, G. & Jentsch, S. A giant ubiquitin-  
1302 conjugating enzyme related to IAP apoptosis inhibitors. *J Cell Biol* **141**, 1415-1422,  
1303 doi:10.1083/jcb.141.6.1415 (1998).
- 1304 48 Wei, Z. *et al.* Liprin-mediated large signaling complex organization revealed by the  
1305 liprin-alpha/CASK and liprin-alpha/liprin-beta complex structures. *Mol Cell* **43**, 586-  
1306 598, doi:10.1016/j.molcel.2011.07.021 (2011).
- 1307 49 Serfass, J. M. *et al.* Endophilin B2 facilitates endosome maturation in response to  
1308 growth factor stimulation, autophagy induction, and influenza A virus infection. *J Biol*  
1309 *Chem* **292**, 10097-10111, doi:10.1074/jbc.M117.792747 (2017).
- 1310 50 Szymczak, A. L. *et al.* Correction of multi-gene deficiency in vivo using a single 'self-  
1311 cleaving' 2A peptide-based retroviral vector. *Nat Biotechnol* **22**, 589-594,  
1312 doi:10.1038/nbt957 (2004).
- 1313 51 Li, H., Rao, A. & Hogan, P. G. Structural delineation of the calcineurin-NFAT  
1314 interaction and its parallels to PP1 targeting interactions. *J Mol Biol* **342**, 1659-1674,  
1315 doi:10.1016/j.jmb.2004.07.068 (2004).
- 1316 52 Gingras, A. C., Abe, K. T. & Raught, B. Getting to know the neighborhood: using  
1317 proximity-dependent biotinylation to characterize protein complexes and map

- 1318 organelles. *Current opinion in chemical biology* **48**, 44-54,  
1319 doi:10.1016/j.cbpa.2018.10.017 (2018).
- 1320 53 Roux, K. J., Kim, D. I., Raida, M. & Burke, B. A promiscuous biotin ligase fusion protein  
1321 identifies proximal and interacting proteins in mammalian cells. *J Cell Biol* **196**, 801-  
1322 810, doi:10.1083/jcb.201112098 (2012).
- 1323 54 Oganessian, I., Lento, C. & Wilson, D. J. Contemporary hydrogen deuterium exchange  
1324 mass spectrometry. *Methods* **144**, 27-42, doi:10.1016/j.ymeth.2018.04.023 (2018).
- 1325 55 Masson, G. R., Jenkins, M. L. & Burke, J. E. An overview of hydrogen deuterium  
1326 exchange mass spectrometry (HDX-MS) in drug discovery. *Expert Opin Drug Discov*  
1327 **12**, 981-994, doi:10.1080/17460441.2017.1363734 (2017).
- 1328 56 Hornbeck, P. V. *et al.* PhosphoSitePlus, 2014: mutations, PTMs and recalibrations.  
1329 *Nucleic Acids Res* **43**, D512-520, doi:10.1093/nar/gku1267 (2015).
- 1330 57 Brombacher, E. *et al.* Rab1 guanine nucleotide exchange factor SidM is a major  
1331 phosphatidylinositol 4-phosphate-binding effector protein of Legionella  
1332 pneumophila. *J Biol Chem* **284**, 4846-4856, doi:10.1074/jbc.M807505200 (2009).
- 1333 58 Hendus-Altenburger, R. *et al.* Molecular basis for the binding and selective  
1334 dephosphorylation of Na(+)/H(+) exchanger 1 by calcineurin. *Nat Commun* **10**, 3489,  
1335 doi:10.1038/s41467-019-11391-7 (2019).
- 1336 59 Czirjak, G. & Enyedi, P. Targeting of calcineurin to an NFAT-like docking site is  
1337 required for the calcium-dependent activation of the background K<sup>+</sup> channel, TRESK.  
1338 *J Biol Chem* **281**, 14677-14682, doi:10.1074/jbc.M602495200 (2006).
- 1339 60 Coghlan, V. M. *et al.* Association of protein kinase A and protein phosphatase 2B  
1340 with a common anchoring protein. *Science* **267**, 108-111,  
1341 doi:10.1126/science.7528941 (1995).



- 1342 61 Akimzhanov, A. M. & Boehning, D. Rapid and transient palmitoylation of the tyrosine  
1343 kinase Lck mediates Fas signaling. *Proc Natl Acad Sci U S A* **112**, 11876-11880,  
1344 doi:10.1073/pnas.1509929112 (2015).
- 1345 62 Dekker, F. J. *et al.* Small-molecule inhibition of APT1 affects Ras localization and  
1346 signaling. *Nat Chem Biol* **6**, 449-456, doi:10.1038/nchembio.362 (2010).
- 1347 63 Chen, J. J., Fan, Y. & Boehning, D. Regulation of Dynamic Protein S-Acylation. *Front*  
1348 *Mol Biosci* **8**, 656440, doi:10.3389/fmolb.2021.656440 (2021).
- 1349 64 Liu, P. *et al.* PtdIns(3,4,5)P<sub>3</sub>-Dependent Activation of the mTORC2 Kinase Complex.  
1350 *Cancer Discov* **5**, 1194-1209, doi:10.1158/2159-8290.CD-15-0460 (2015).
- 1351 65 Ebner, M., Sinkovics, B., Szczygiel, M., Ribeiro, D. W. & Yudushkin, I. Localization of  
1352 mTORC2 activity inside cells. *J Cell Biol* **216**, 343-353, doi:10.1083/jcb.201610060  
1353 (2017).
- 1354 66 Schroder, W. A. *et al.* Human Sin1 contains Ras-binding and pleckstrin homology  
1355 domains and suppresses Ras signalling. *Cell Signal* **19**, 1279-1289,  
1356 doi:10.1016/j.cellsig.2007.01.013 (2007).
- 1357 67 Stauffer, W., Sheng, H. & Lim, H. N. EzColocalization: An ImageJ plugin for visualizing  
1358 and measuring colocalization in cells and organisms. *Sci Rep* **8**, 15764,  
1359 doi:10.1038/s41598-018-33592-8 (2018).
- 1360 68 Shteynberg, D. *et al.* iProphet: multi-level integrative analysis of shotgun proteomic  
1361 data improves peptide and protein identification rates and error estimates. *Mol Cell*  
1362 *Proteomics* **10**, M111 007690, doi:10.1074/mcp.M111.007690 (2011).
- 1363 69 Liu, G. *et al.* ProHits: integrated software for mass spectrometry-based interaction  
1364 proteomics. *Nat Biotechnol* **28**, 1015-1017, doi:10.1038/nbt1010-1015 (2010).

- 1365 70 Eng, J. K., Jahan, T. A. & Hoopmann, M. R. Comet: an open-source MS/MS sequence  
1366 database search tool. *Proteomics* **13**, 22-24, doi:10.1002/pmic.201200439 (2013).
- 1367 71 Keller, A., Nesvizhskii, A. I., Kolker, E. & Aebersold, R. Empirical statistical model to  
1368 estimate the accuracy of peptide identifications made by MS/MS and database  
1369 search. *Anal Chem* **74**, 5383-5392, doi:10.1021/ac025747h (2002).
- 1370 72 Nesvizhskii, A. I., Keller, A., Kolker, E. & Aebersold, R. A statistical model for  
1371 identifying proteins by tandem mass spectrometry. *Anal Chem* **75**, 4646-4658,  
1372 doi:10.1021/ac0341261 (2003).
- 1373 73 St-Denis, N. *et al.* Myotubularin-related proteins 3 and 4 interact with polo-like  
1374 kinase 1 and centrosomal protein of 55 kDa to ensure proper abscission. *Mol Cell*  
1375 *Proteomics* **14**, 946-960, doi:10.1074/mcp.M114.046086 (2015).
- 1376 74 St-Denis, N. *et al.* Phenotypic and Interaction Profiling of the Human Phosphatases  
1377 Identifies Diverse Mitotic Regulators. *Cell Rep* **17**, 2488-2501,  
1378 doi:10.1016/j.celrep.2016.10.078 (2016).
- 1379 75 Stariha, J. T. B., Hoffmann, R. M., Hamelin, D. J. & Burke, J. E. Probing Protein-  
1380 Membrane Interactions and Dynamics Using Hydrogen-Deuterium Exchange Mass  
1381 Spectrometry (HDX-MS). *Methods Mol Biol* **2263**, 465-485, doi:10.1007/978-1-0716-  
1382 1197-5\_22 (2021).
- 1383 76 Dobbs, J. M., Jenkins, M. L. & Burke, J. E. Escherichia coli and Sf9 Contaminant  
1384 Databases to Increase Efficiency of Tandem Mass Spectrometry Peptide  
1385 Identification in Structural Mass Spectrometry Experiments. *J Am Soc Mass Spectrom*  
1386 **31**, 2202-2209, doi:10.1021/jasms.0c00283 (2020).

1387 77 Masson, G. R. *et al.* Recommendations for performing, interpreting and reporting  
1388 hydrogen deuterium exchange mass spectrometry (HDX-MS) experiments. *Nat*  
1389 *Methods* **16**, 595-602, doi:10.1038/s41592-019-0459-y (2019).

1390 78 Perez-Riverol, Y. *et al.* The PRIDE database and related tools and resources in 2019:  
1391 improving support for quantification data. *Nucleic Acids Res* **47**, D442-D450,  
1392 doi:10.1093/nar/gky1106 (2019).

1393  
1394  
1395  
1396  
1397  
1398  
1399  
1400  
1401  
1402  
1403  
1404  
1405  
1406  
1407  
1408  
1409  
1410  
1411  
1412  
1413

1414 **Acknowledgements:**

1415 We thank Callie Preast Wigington for critical reading of the manuscript, Rachel Bond for  
1416 generating most of the CNA $\beta$  plasmids used in this study and for initiating experiments to  
1417 identify CNA $\beta$ -interacting proteins, Pin-Joe Ko for helpful discussions about quantitative  
1418 image analysis, Jamin Hein for assistance in developing the phospho-specific FAM126A  
1419 antibody, the Skotheim lab for cell lines, the De Camilli lab for plasmids and all members of  
1420 the Cyert lab for their support and critical feedback. M.S.C. and I.U.T. are supported by  
1421 grants from the National Institute of Health R01GM129236 and R35GM136243. J.E.B.  
1422 acknowledges funding support from a Discovery grant from the Natural Science and  
1423 Engineering Research Council of Canada (NSERC-2020-04241, JEB), and the Michael  
1424 Smith Foundation for Health Research (JEB, Scholar Award 17686). G.G. and T.B. are  
1425 supported by the Intramural Research Program of the Eunice Kennedy Shriver National  
1426 Institute of Child Health and Human Development of the NIH. A.C.G. is supported by a grant  
1427 from the Canadian Institutes of Health Research (FDN 143301). P.V. is supported by the  
1428 Hungarian National Research, Development and Innovation Fund (NKFIK134357). E.C.  
1429 acknowledges support from the Canadian Institutes of Health Research (PJT-162184).

1430

1431 **Author contributions**

1432 I.U.T. and M.S.C. jointly designed the study. I.U.T. performed the majority of the  
1433 experiments and analyzed data, supervised by M.S.C., with the exception of the following:  
1434 M.A.H.P., M.L.J. and J.E.B. designed and executed HDX-MS experiments. J.R. carried out  
1435 *in vitro* binding studies. A.Z.L.S. and E.C. designed and performed pulse-chase analyses of  
1436 palmitate incorporation. N.S. and A.C.G. designed and conducted AP-MS experiments.  
1437 BRET-based analyses of PI4P dynamics were designed and executed by P.V. (effects of CN  
1438 inhibitors) and by G.G. and T.B. (analyses of FAM126A mutants). I.U.T. and M.S.C. wrote  
1439 the manuscript with editorial input and approval from all authors. Correspondence and  
1440 requests for materials/plasmids should be addressed to M.S.C (mcyert@stanford.edu).

1441 **Competing interests statement**

1442 Authors declare no competing interests.

1443

1444 **Figure legends**

1445

1446 **Figure 1:** CNA $\beta$ 1 localizes to intracellular membranes via palmitoylation at two conserved  
1447 cysteines unique to its C-terminal tail. **a** Schematic of the domain architecture of CNA $\beta$   
1448 isoforms. Regulatory subunit binding domain (CNB), calmodulin binding domain (CaM).  
1449 Autoinhibitory domain, AID, shown in blue; LAVP sequence shown in green. Palmitoylated  
1450 cysteines are in red. **b** Sequence conservation of the CNA $\beta$ 1 C-terminal tail (a.a 456-496)  
1451 across vertebrates. The autoinhibitory LAVP sequence motif (green) and palmitoylated  
1452 cysteines (red, C483 and C493), are boxed. **c** Representative immunoblot of subcellular  
1453 fractions of COS-7 cells transfected with FLAG-CNA $\beta$ 2, -CNA $\beta$ 1 (WT or cysteine mutants) or  
1454 EFR3B-FLAG. The CNA $\beta$  isoforms and EFR3B were detected using anti-FLAG antibody.  
1455 GM130 and GAPDH were used as membrane and cytosol markers, respectively. **d**  
1456 Quantification of four independent experiments as in **c**. Data are presented as mean  $\pm$  SEM  
1457 (n=4). n.s. not significant, \*\*\*  $p < 0.001$ , \*\*\*\*  $p < 0.0001$  using two-way ANOVA with Holm-  
1458 Sidaks multiple comparison tests. **e** Representative images of COS-7 cells expressing  
1459 FLAG-tagged CNA $\beta$ 2, CNA $\beta$ 1 or CNA $\beta$ 1 double mutant C483/C493S with the PM marker  
1460 Venus-tagged Rit (green). Fixed cells immunostained with anti-FLAG (red) and anti-GM130  
1461 (blue). Scale bar = 15  $\mu$ m. **f** Graph on top: Co-localization of FLAG signal (as in **e**) with Golgi  
1462 marker GM130. Data are presented as median Pearson`s coefficients. At least 100 cells  
1463 were analyzed across three independent replicates. n.s not significant, Asterisks denote  
1464 statistical significance: \*\*\*\*  $p < 0.0001$ , using one-way ANOVA followed by Kruskal-Wallis  
1465 test. **e** Graph at the bottom: PM localization is quantified as the anti-FLAG signal intensity at  
1466 the cell periphery (defined in Supplementary Fig. 1d) over total cell intensity. Refer to  
1467 methods for details. Data are presented as median. At least 70 cells were imaged across  
1468 three independent replicates. \*\*\*\*  $p < 0.0001$  using one-way ANOVA followed by Kruskal-

1469 Wallis test. **g** Representative immunoblot of Acyl-PEG exchange assay done in COS-7 cells  
1470 transfected with FLAG-CNA $\beta$ 2, FLAG -CNA $\beta$ 1 (WT or cysteine mutants: singles and double)  
1471 or EFR3B-FLAG. The number of PEGylation (reflecting S-palmitoylation) events are  
1472 indicated by asterisks (\*). Arrowhead indicates non-specific antibody band. n  $\geq$ 3 experiments  
1473 for all constructs

1474

1475 **Figure 2:** CNA $\beta$ 1 palmitoylation is dynamic: ABHD17A expression promotes CNA $\beta$ 1  
1476 depalmitoylation and alters CNA $\beta$ 1 subcellular localization. **a** Schematic diagram of the  
1477 pulse-chase experiment using analogs of palmitate (17-ODYA) and methionine (L-AHA)  
1478 coupled to CLICK chemistry used in this study. **b** Pulse-chase analysis of palmitate turnover  
1479 on FLAG-CNA $\beta$ 1 by dual-click chemistry as described in **a** in the presence of DMSO or pan-  
1480 depalmitoylase inhibitor Palm B. Representative in-gel fluorescence scans showing dual  
1481 detection of 17-ODYA and L-AHA using Alexa Fluor 647 and Alexa Fluor 488, respectively.  
1482 **c** Time course of FLAG-CNA $\beta$ 1 depalmitoylation in DMSO- and Palm B-treated cells after  
1483 normalizing 17-ODYA to L-AHA signals at each chase time. Data are mean  $\pm$  SEM, n= 2 **d**  
1484 Analysis of GFP-CNA $\beta$ 1 palmitoylation co-expressed with vector, ABHD17A-FLAG (WT or  
1485 S190A) or FLAG-APT2, using metabolic labelling with 17-ODYA. Representative  
1486 immunoblot illustrates total CNA $\beta$ 1 using anti-GFP and 17-ODYA detected using streptavidin  
1487 following CLICK chemistry with azide-Biotin. Anti-FLAG shows amount of ABHD17A and  
1488 APT2 expression. **e** Level of GFP-CNA $\beta$ 1 palmitoylation in **d** is quantified by the  
1489 streptavidin signal (17-ODYA) / total protein signal (GFP) and normalized to vector control.  
1490 Data are mean  $\pm$  SEM (n=4). n.s. not significant, \*\*\*\*  $p < 0.0001$  using one-way ANOVA with  
1491 Dunnett's multiple comparison tests. **f** Representative IF images of fixed, COS-7 cells co-  
1492 expressing GFP-CNA $\beta$ 1 with vector, ABHD17A-FLAG (WT or S190A). Scale bar = 15  $\mu$ m. **g**  
1493 Images in **f** quantified, scatter plot represents the intensity of GFP- CNA $\beta$ 1 at the PM relative  
1494 to total GFP signal. At least 75 cells quantified per condition across three replicates. n.s. not  
1495 significant, \*\*\*\*  $p < 0.0001$  using one-way ANOVA followed by Kruskal-Wallis test.

1496

1497 **Figure 3:** CNA $\beta$ 1-enriched interactors are membrane-associated. **a** Schematic of the  
1498 experimental plan used for AP-MS analyses. **b** Dotplot of AP-MS results including CNA $\beta$ 1-  
1499 enriched interactors (those with spectral counts  $\geq 1.5x$  more for CNA $\beta$ 1 than other baits).  
1500 Node edge color corresponds to bayesian false discovery rate (BFDR), node size displays  
1501 prey abundance and node darkness represents number of spectral counts. Full results  
1502 reported in Supplementary Fig. 3a and Supplementary Table 1. **c** Cartoon representation of  
1503 the structural organization of the phosphatidylinositol 4-kinase complex that comprises  
1504 PI4KA (grey), FAM126A (orange), TTC7B (green) and EFR3B (pink). Phosphatidylinositol,  
1505 PI (white); phosphatidylinositol 4-phosphate, PI4P (purple). **d** Immunoblot analysis of the  
1506 anti-GFP immunoprecipitates from inducible Flp-In-Trex cells expressing GFP-CNA $\beta$ 2,  
1507 CNA $\beta$ 1 or CNA $\beta$ 1<sup>C2S</sup> (C483S/C493S), transfected with EFR3B-HA, TTC7B-MYC, FLAG-  
1508 FAM126A and GFP-PI4KA. **e** Amount of GFP-CNA $\beta$ 2 and GFP-CNA $\beta$ 1<sup>C2S</sup> co-purified with  
1509 EFR3B-HA, quantified as bound GFP signal/ bound HA signal normalized to input. Data are  
1510 the mean  $\pm$  SD (n=4). n.s. not significant, \*\*\*  $p < 0.001$ , \*\*\*\*  $p < 0.0001$  by unpaired- t-test.

1511  
1512 **Figure 4:** FAM126A has a CN binding PxlIT motif. **a** Schematic of FAM126A with the 16-  
1513 mer peptide (aa.506-521) containing the PSISIT sequence bolded and underlined. ASASAA  
1514 mutations are shown in red. Gray circles denote known phosphorylation sites. The red circle  
1515 denotes phospho-Ser 485. **b** Representative immunoblot showing the biotinylation of the  
1516 expressed PI4KA complex containing FLAG-FAM126A (WT or ASASAA) by MYC-BirA\*-  
1517 CNA $\beta$ 1 in HeLa cells. The arrow shows a small fraction of the uncut P2A protein. **c**  
1518 Biotinylation quantified as bound signal/ MYC bound signal normalized to input signal/Actin  
1519 signal. Data are the mean  $\pm$  SEM (n=3). n.s. not significant, \*  $p < 0.05$ , \*\*  $p < 0.01$ , \*\*\*  $p <$   
1520 0.001 using unpaired t-tests. **d-e** HDX data for CN heterodimer (CNA/CNB) and the  
1521 PI4KA/TTC7B/FAM126A trimer. **d** Differences in the number of deuterium incorporation for all  
1522 analyzed peptides over the deuterium exchange (HDX) time course. Proteins with significant  
1523 differences between apo and complex state are shown. Every point represents the central  
1524 residue of a peptide. Peptides with significant HDX (>5%, 0.5 Da, and an unpaired t-test



1525  $p < 0.01$ ) are highlighted in red. **e** Deuterium incorporation differences between selected CNA  
1526 and CNB peptides in the presence of PI4KA/TTC7B/FAM126A trimer are shown. Black lines  
1527 represent CN in its apo state, red lines represent CN co-incubated with the PI4KA trimer. **f**  
1528 Maximum significant differences in HDX observed in CNA/CNB across all time points upon  
1529 incubation with PI4KA trimer are mapped onto the structure of CN<sup>58</sup> (PDB: 6NUC). Peptides  
1530 are colored according to the legend. The PxIxIT and LxVP motifs identified in NHE1<sup>58</sup> are  
1531 highlighted in green. **g** Deuterium incorporation differences in selected FAM126A and PI4KA  
1532 peptides displaying significant decreases in amide exchange in the presence of CN are  
1533 shown. All error bars show the S.D. ( $n = 3$ ). **h** Maximum significant differences in HDX  
1534 observed for PI4KA/FAM126A/TTC7B trimer in the presence of CN are mapped onto the  
1535 structure of the PI4KA trimer<sup>34</sup> (PDB:6BQ1). Dotted lines depict the unresolved regions in  
1536 the PI4KA/TTC7/FAM126A structure, colors represent the percentages of significant  
1537 differences in exchange. **i** Schematic of the PI4KA complex with putative CN interaction  
1538 sites. The full set of peptides and source data can be found in Supplementary Fig. 4d-e and  
1539 Supplementary Table 3, respectively.

1540

1541 **Figure 5:** FAM126A is a novel CN substrate. **a.** Representative immunoblot showing the  
1542 electro-mobility shifts observed for FLAG-FAM126A when expressed in HeLa cells. Lysates  
1543 expressing FLAG-FAM126A (WT, S485A, ASASAA or ASASAA+S485A) in the presence or  
1544 absence of EFR3B-HA/ TTC7B-MYC are analyzed using MYC, HA, FLAG (red bands) and a  
1545 phospho-specific pFAM126A S485A (green bands) antibodies. PI and PII: phosphorylated  
1546 states; deP: dephosphorylated state. **b** Immunoblot analysis of FLAG FAM126A (WT or  
1547 ASASAA) phosphorylation status in HeLa cells co-expressing FLAG-FAM126A, TTC7B-  
1548 MYC and EFR3B-HA across various treatments: DMSO (vehicle), FK506 (CN-inhibitor),  
1549 PMA (PKC activator), BIM (PKC). Lysates were resolved by SDS-PAGE and analyzed using  
1550 anti-FLAG (red), anti-HA and anti-pFAM126A S485A (green) antibodies. PKC activation was  
1551 assessed by phosphorylation of the downstream substrate, ERK using p44/42 Erk1/2  
1552 antibody. Arrows denote non-specific antibody background. **c** FAM126A phosphorylation at

1553 Ser485 was quantified as the ratio of total pFAM126A S485 signal/ total FLAG signal relative  
1554 to DMSO treated FLAG-FAM126A WT. Data are the mean  $\pm$  SEM (n=5). \*  $p < 0.05$ , \*\*  $p$   
1555  $< 0.01$ , \*\*\*  $p < 0.001$ , \*\*\*\*  $p < 0.0001$  using one-way ANOVAs with Dunnett's multiple  
1556 comparison tests.

1557

1558 **Figure 6:** CN regulates PI4P synthesis by the PI4KA complex. **a.** Immunoblot analysis of the  
1559 PI4KA complex components in anti-HA immunoprecipitates of HeLa cells expressing GFP-  
1560 PI4KA, EFR3B-HA/TTC7B-MYC with WT or ASASAA mutant FLAG-FAM126A. Arrow points  
1561 to the uncut P2A form. Arrowhead denotes non-specific antibody bands. **b** Co-purification of  
1562 each component in with EFR3B-HA is quantified and normalized to input. Data are the mean  
1563  $\pm$  SD (n=3). n.s. not significant. **c** Cartoon representation of the BRET pair used in the  
1564 experiments. PI4P binding domain of the Legionella SidM protein (SidM-P4M) attached to  
1565 Renilla Luciferase as the donor and the Venus targeted to the PM using the first 10 amino  
1566 acids of Lck, L10, as the acceptor. **d** Normalized BRET ratios reflecting the changes in the  
1567 PM PI4P levels in response of carbachol stimulation ( $10^{-7}$  M) in HEK293T cells transiently  
1568 expressing muscarinic receptor, M3R, pre-treated with DMSO (blue), or CN inhibitors (red):  
1569 FK506 (1  $\mu$ M) (left) and Cyclosporin A, CsA (10 $\mu$ M) (right) for 1 h. Values are the mean  $\pm$   
1570 SD (n=4). \*\*  $p = 0.0063$ , \*\*\*  $p = 0.0004$  **e** Model for CNA $\beta$ 1 mediated regulation of the PI4KA  
1571 complex that promotes the PM PI4P synthesis during GPCR signaling. The increased  
1572 intracellular Ca<sup>2+</sup> activates CN, and likely, PKC, which in turn regulate the PI4KA complex at  
1573 the PM to promote PI4P and PI(4,5)P<sub>2</sub> replenishment.

1574

## Figure 1

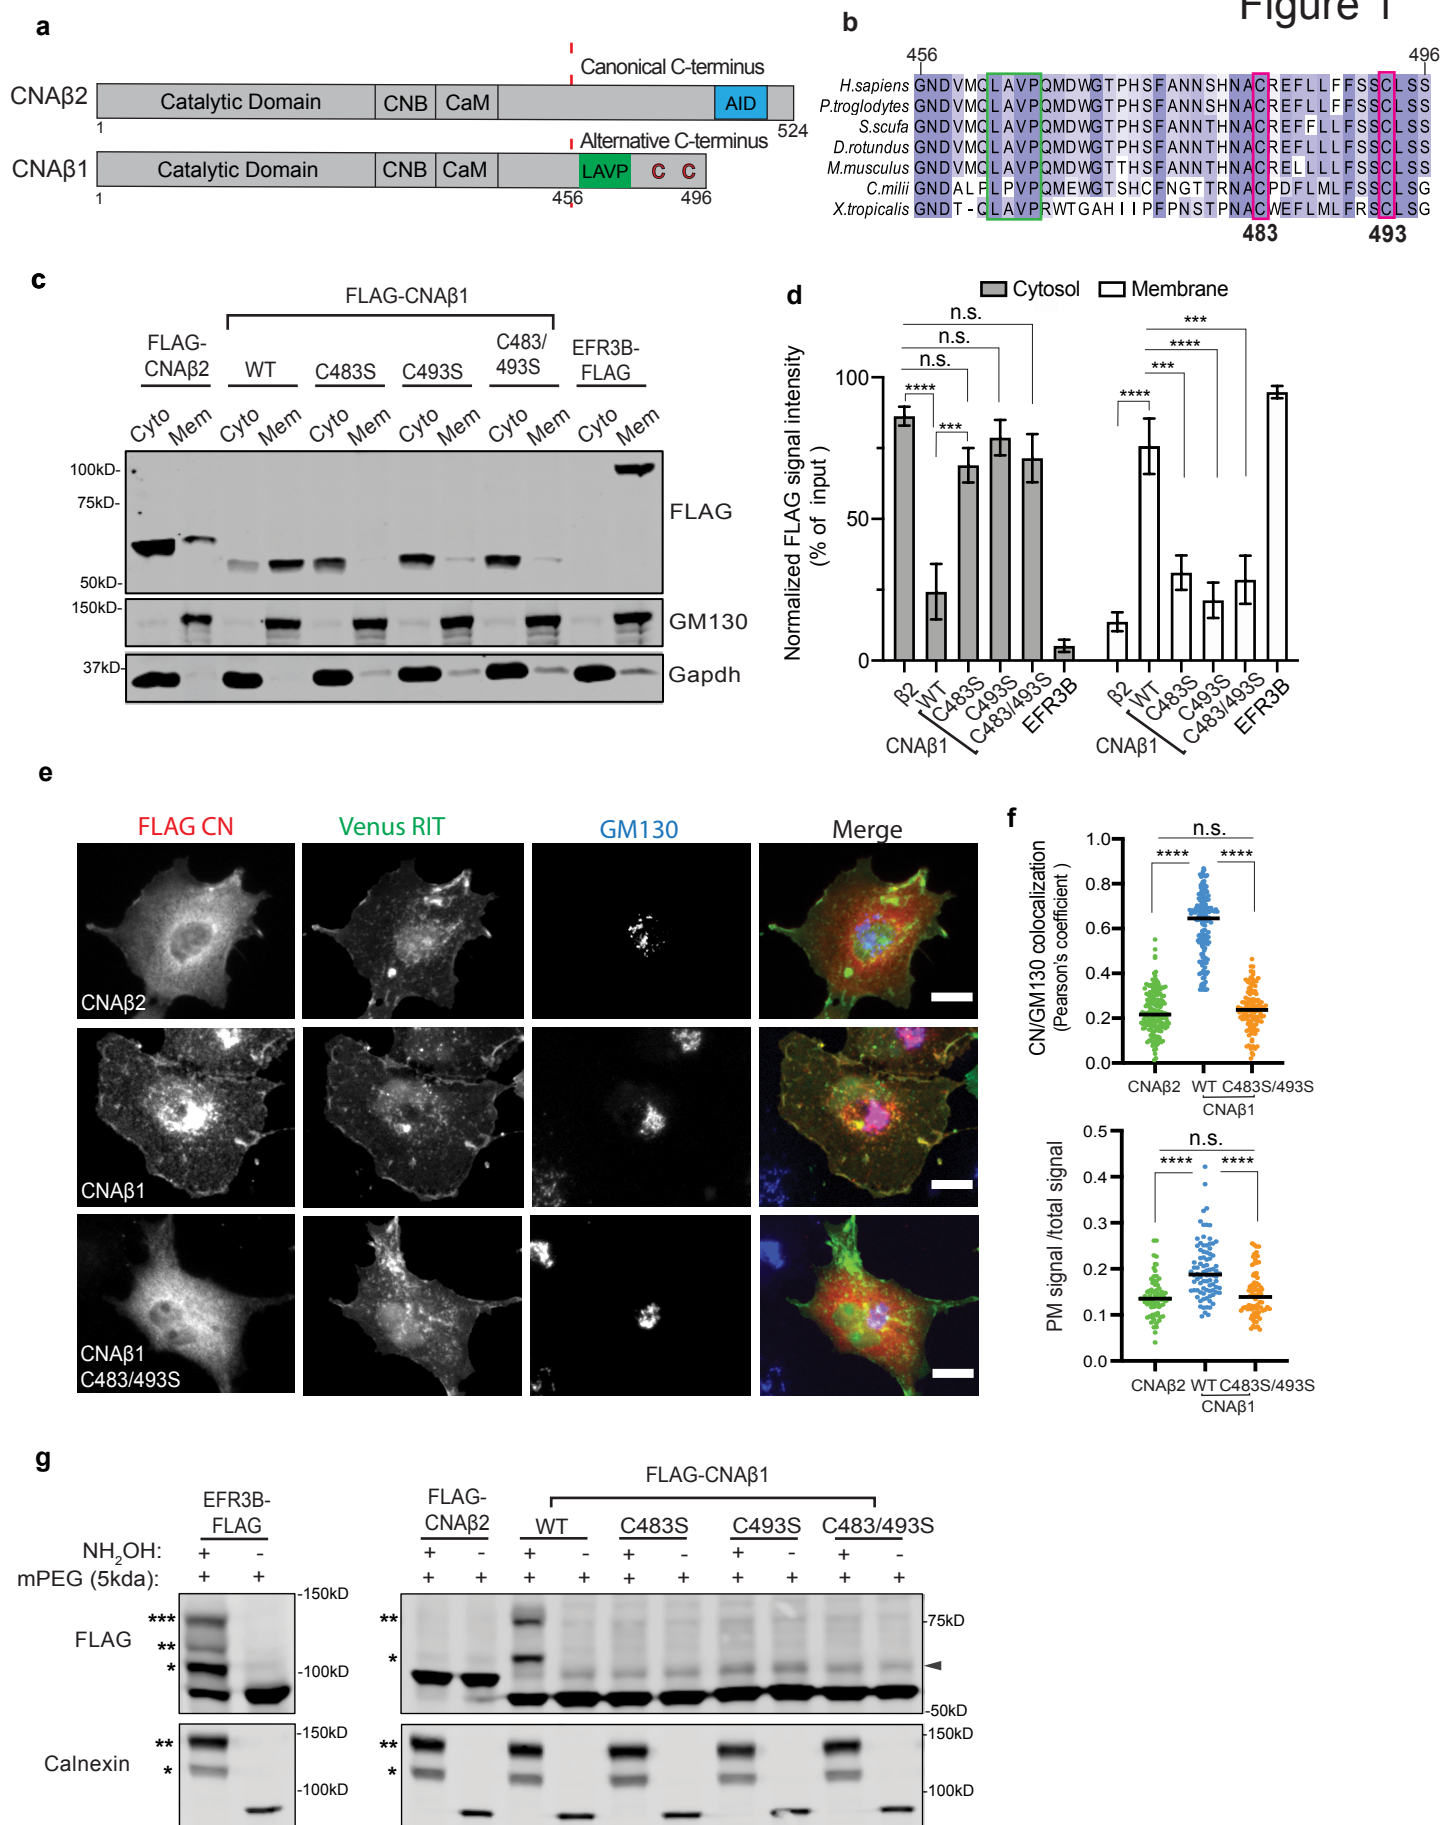

Figure 2

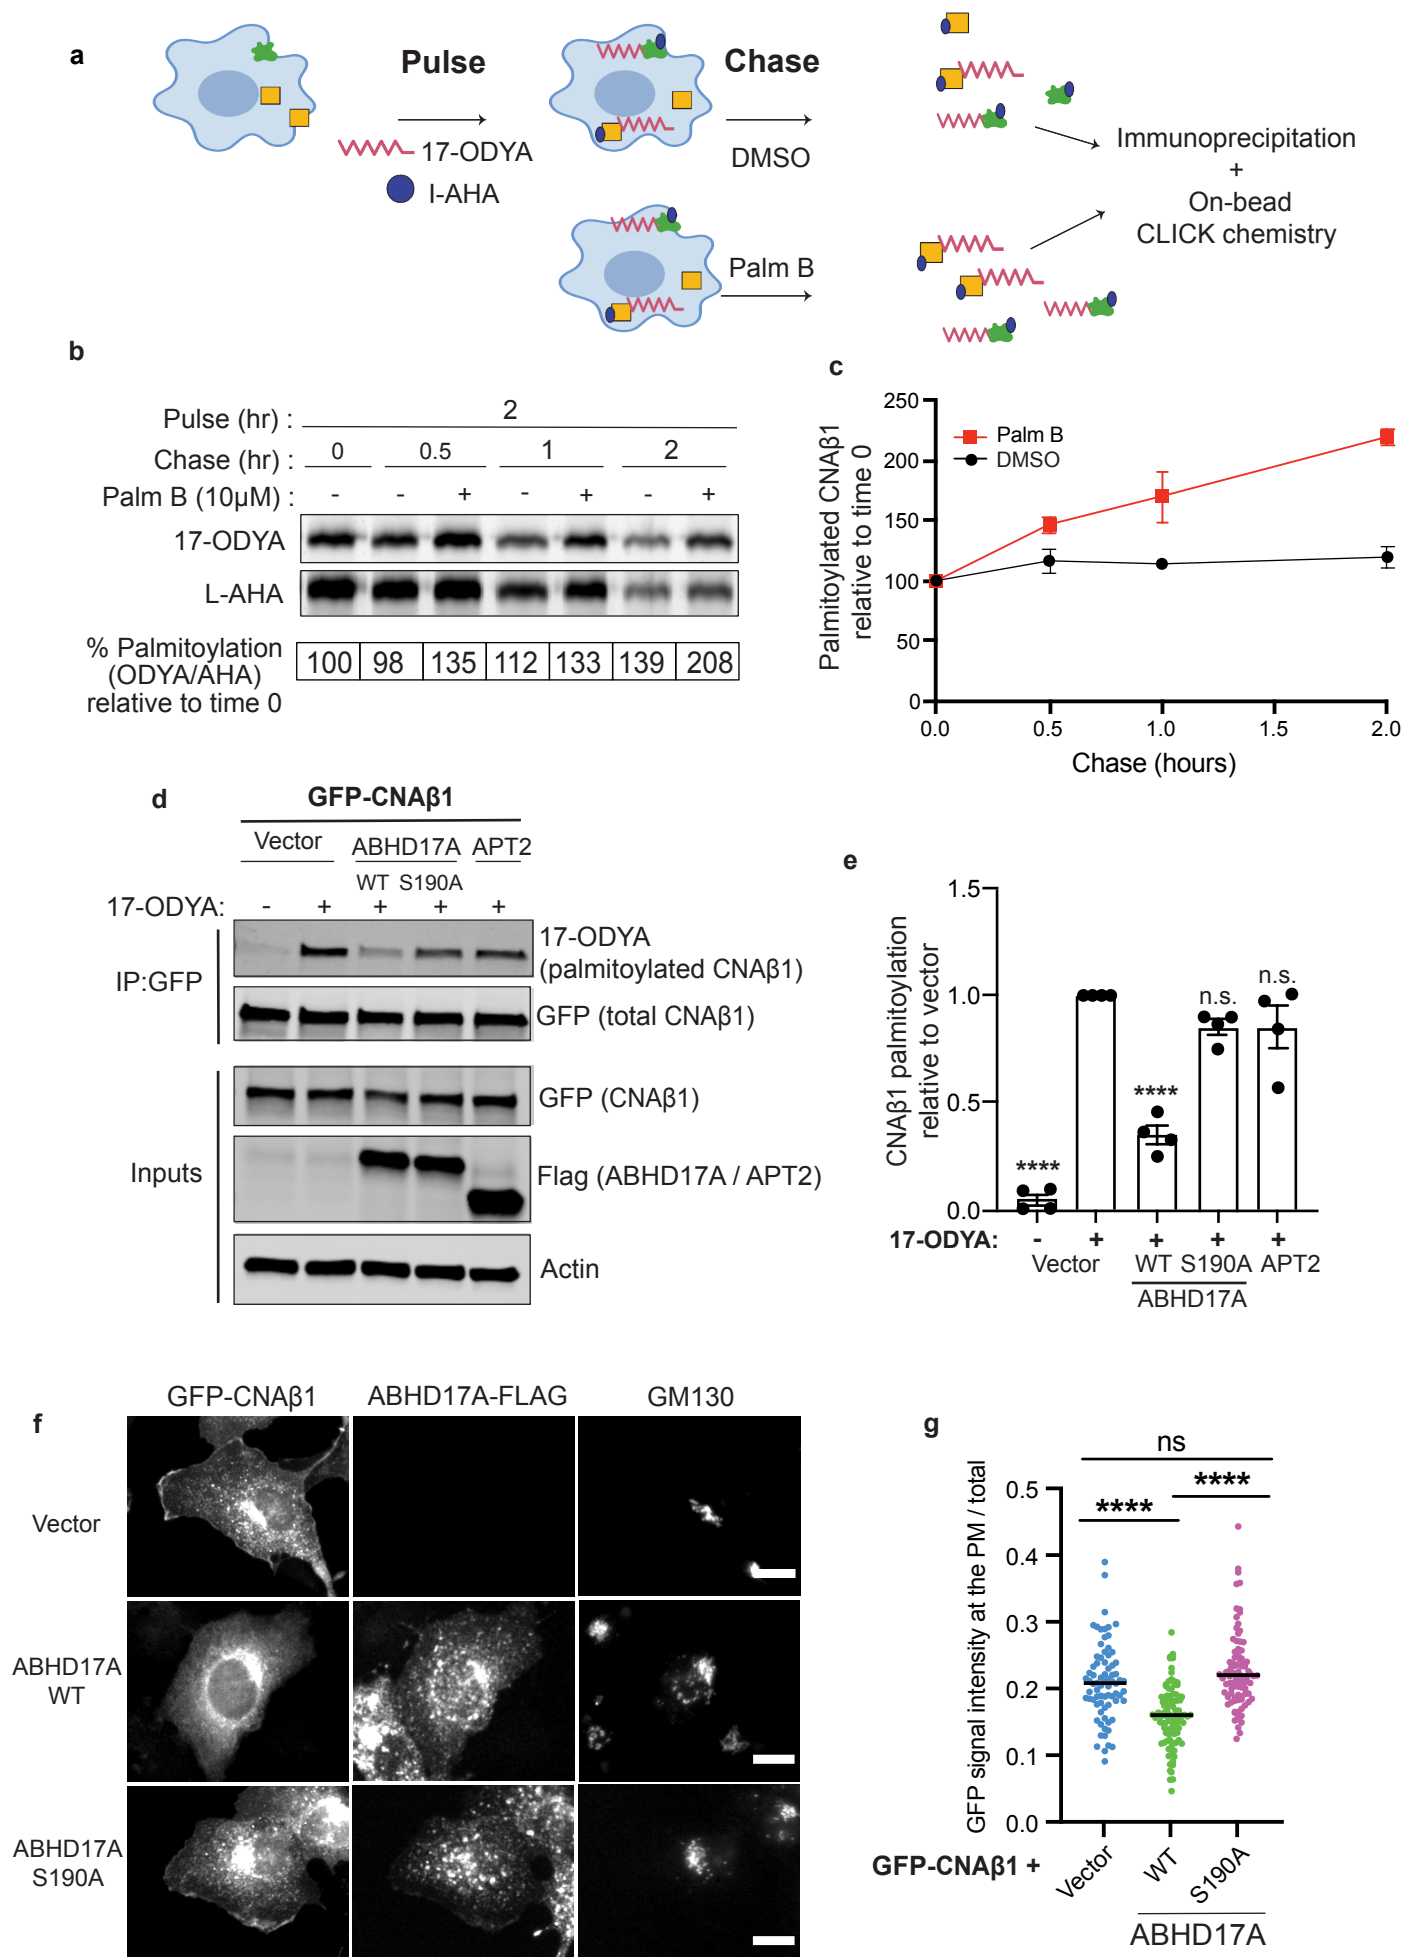

Figure 3

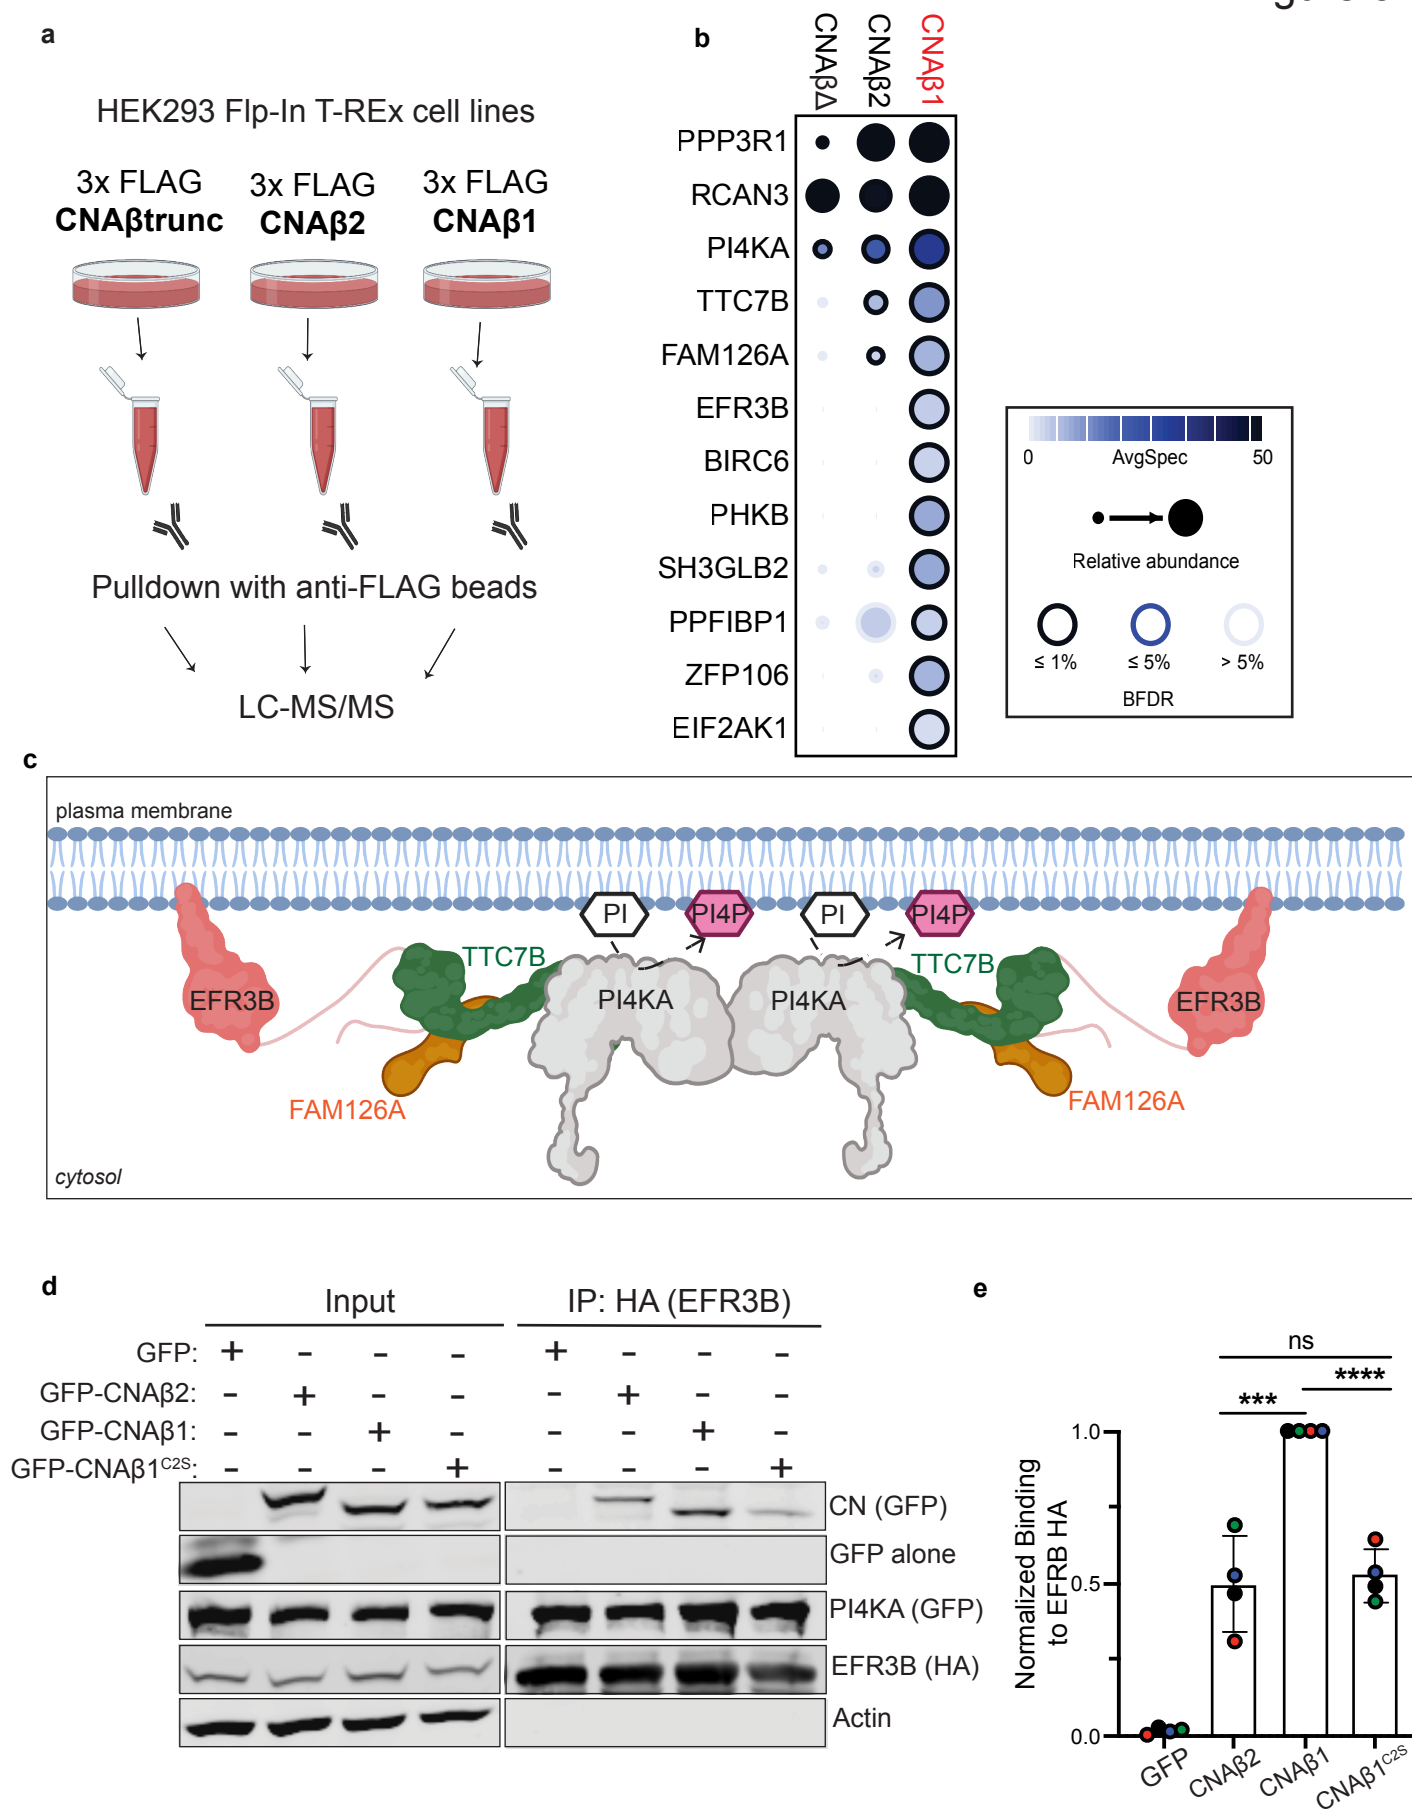



Figure 4

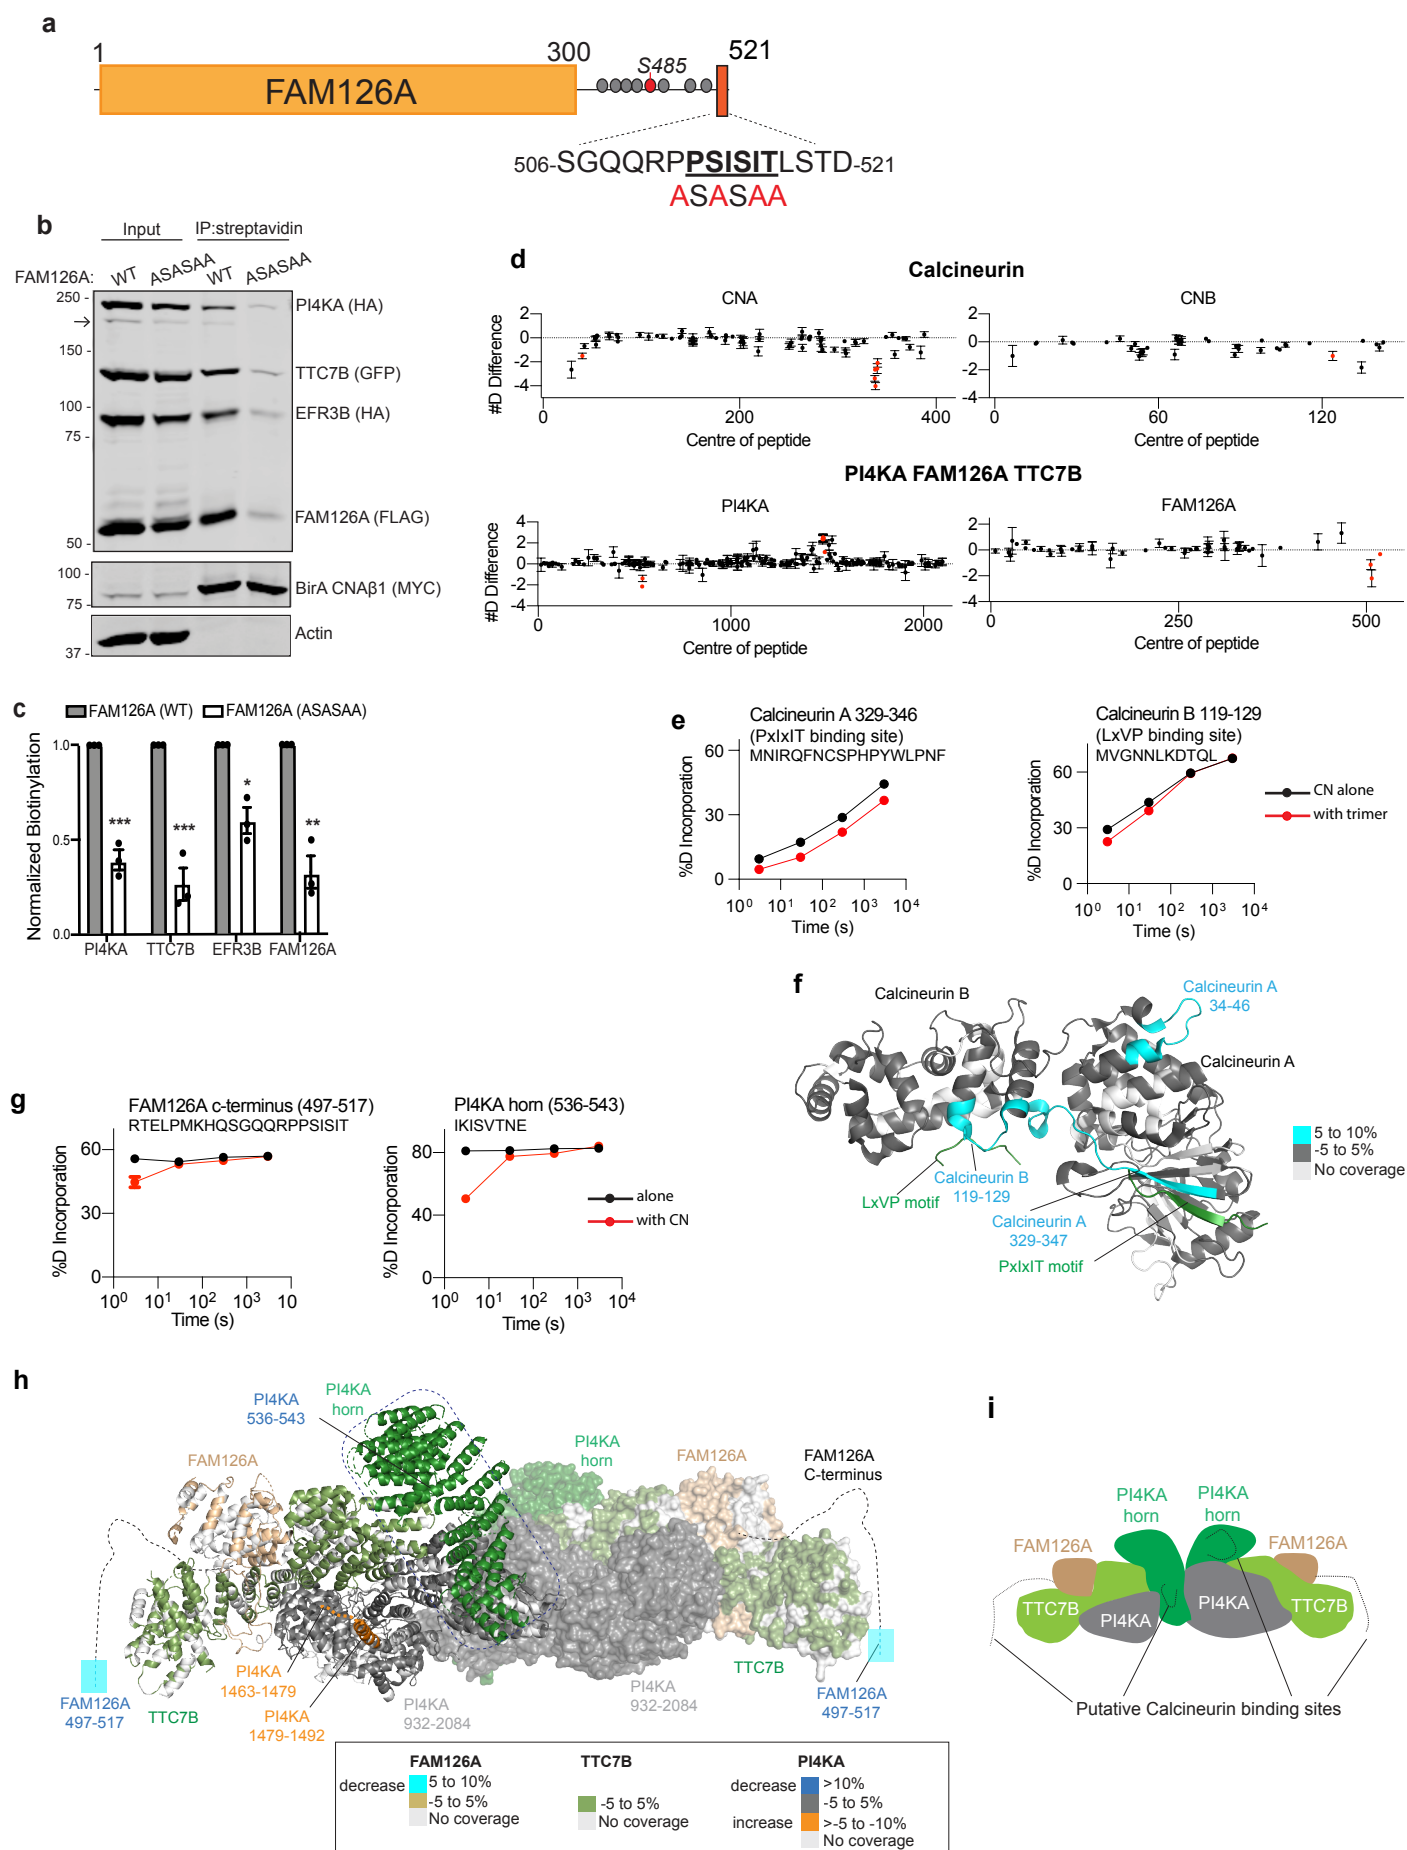

## Figure 5

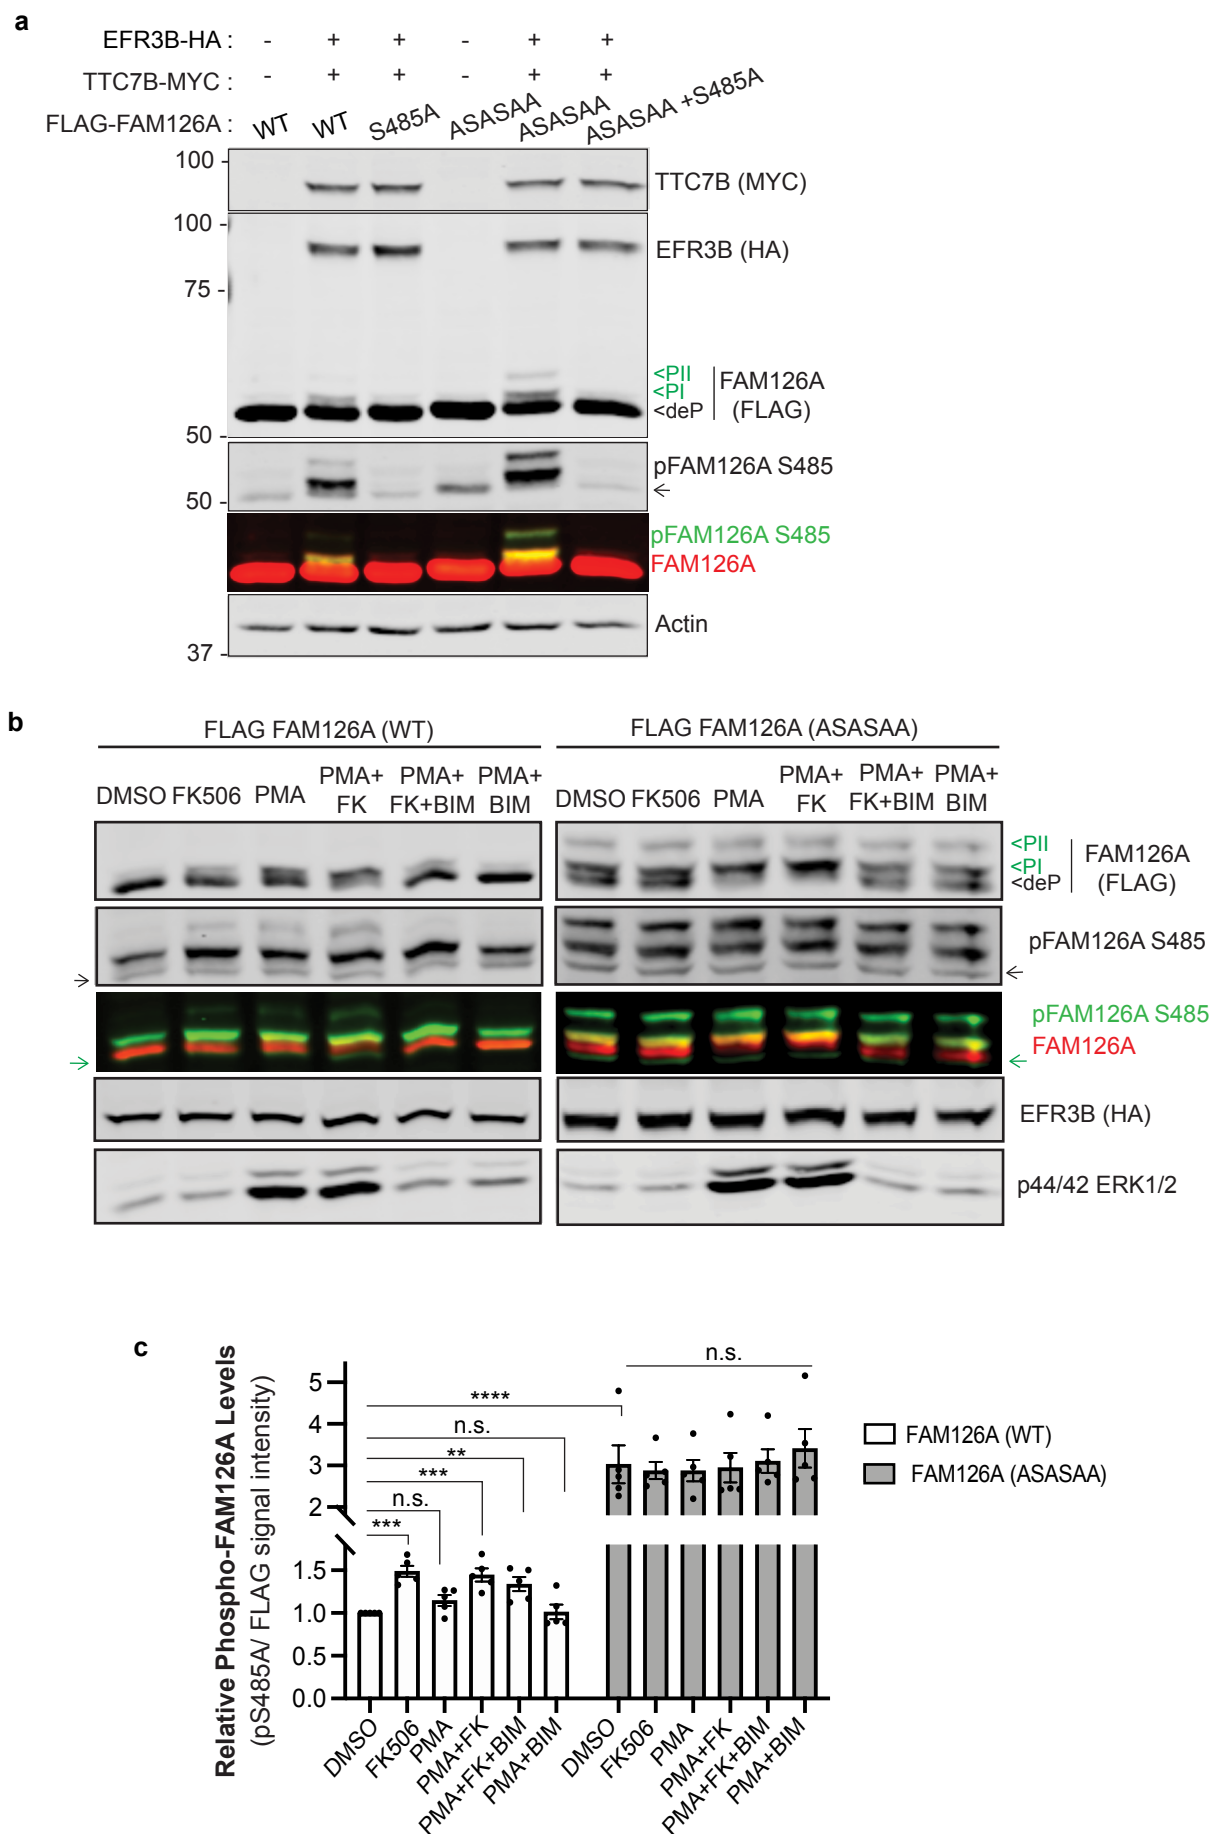



Figure 6

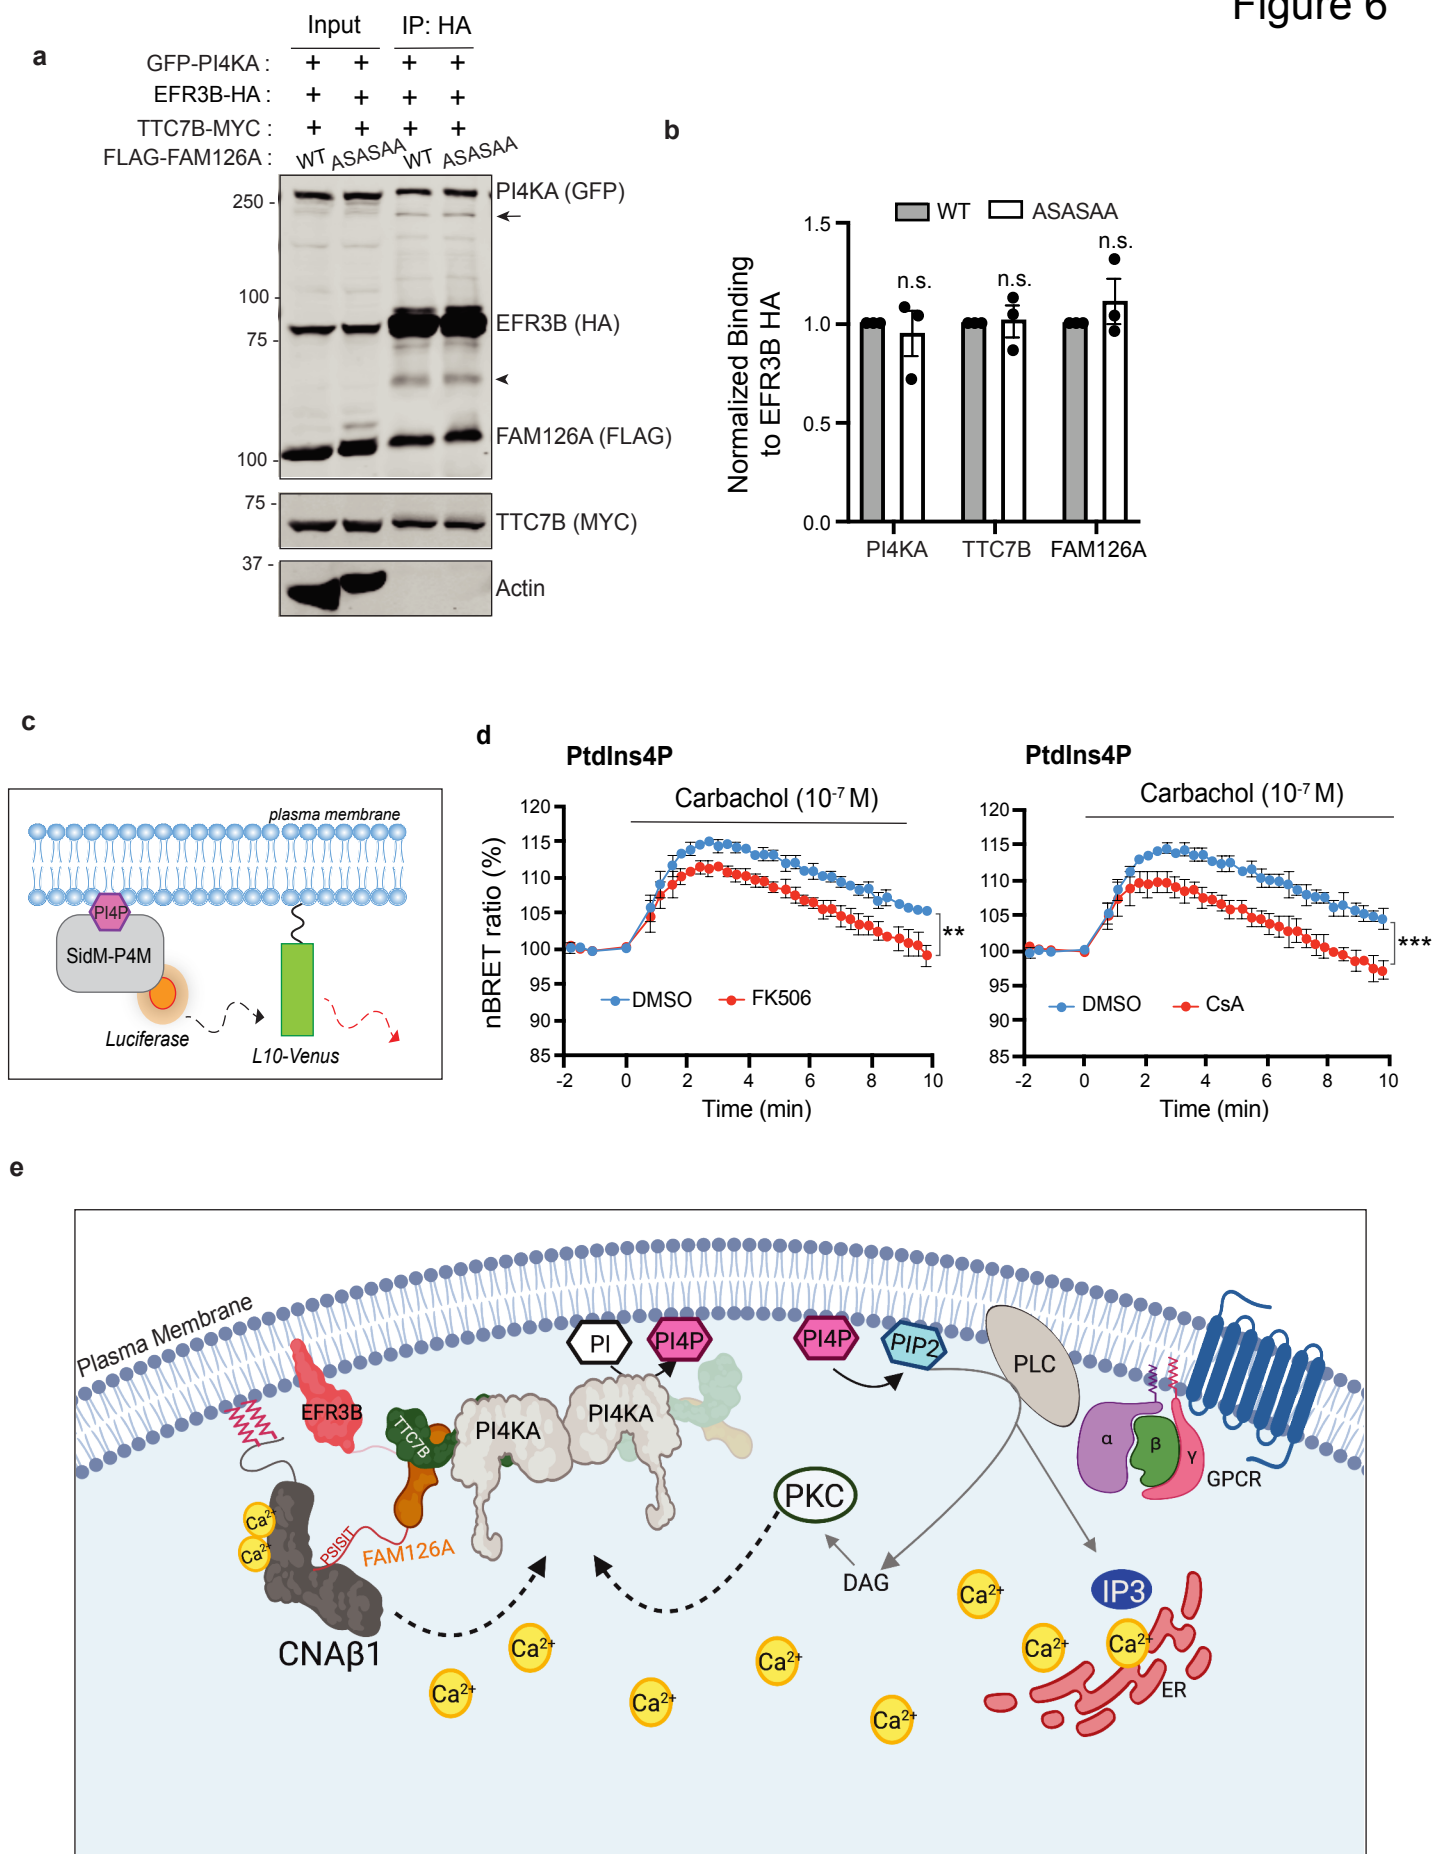

Source: https://biorxiv.org/content/10.1101/2021.07.14.451536v1.full.pdf
